# Supplementary material
Source: publisher figshare collection journal article supplement (https://acs.figshare.com/ndownloader/files/22818233)
Supplement: Supplementary file 1 [file 22818233]

Supporting Information for:

## **NaH Promoted One-Pot Tandem Reactions of 3-(1-Alkynyl)**

### **Chromones to Form 2-Nitrogen-Substituted Xanthenes**

Wen-Di Duan,<sup>†‡</sup> Yu-Fang Zhang,<sup>†‡</sup> and Youhong Hu<sup>\*†‡</sup>

<sup>†</sup>*State Key Laboratory of Drug Research, Shanghai Institute of Materia Medica, Chinese Academy of Sciences, 555 Zuchongzhi Road, Shanghai 201203, China.*

<sup>‡</sup>*University of Chinese Academy of Sciences, No.19A Yuquan Road, Beijing 100049, China.*

#### Table of Contents:

|                                                                                           |           |
|-------------------------------------------------------------------------------------------|-----------|
| 1. Initial attempts in investigation of isocyanoacetates and 3-(1-alkynyl)-chromones..... | S2        |
| 2. NMR Spectra.....                                                                       | S3 – S19  |
| 3. X-ray Crystallography data.....                                                        | S20 – S21 |

1. Initial attempts in investigation of isocyanoacetates and 3-(1-alkynyl)-chromones

**Table S1: Initial attempts in investigation of isocyanoacetates and 3-(1-alkynyl)-chromones<sup>a</sup>**

| Entry | Condition                                                          | Results                     |
|-------|--------------------------------------------------------------------|-----------------------------|
| 1     | Ag <sub>2</sub> O, Et <sub>3</sub> N, rt                           | NR, Substrate Recovered     |
| 2     | DMF, DBU, AgOTf, Sc(OTf) <sub>3</sub> , 50°C                       | Messy                       |
| 3     | DMF, CuCl, Cs <sub>2</sub> CO <sub>3</sub> , Ar, 100°C             | Messy                       |
| 4     | CH <sub>3</sub> CN, CuCl, Ar, 50°C                                 | Furocoumarin A <sup>b</sup> |
| 5     | MeCN, CuCl, Cs <sub>2</sub> CO <sub>3</sub> , Ar, 50°C             | <b>3a</b>                   |
| 6     | MeCN, CuCl, Cs <sub>2</sub> CO <sub>3</sub> , Ar, rt               | <b>3a</b>                   |
| 7     | MeCN, CuCl, Cs <sub>2</sub> CO <sub>3</sub> , Ar, reflux           | <b>3a</b>                   |
| 8     | NMP, Ag <sub>2</sub> O, K <sub>2</sub> CO <sub>3</sub> , MW, 130°C | Messy                       |
| 9     | NMP, AgOAc, K <sub>2</sub> CO <sub>3</sub> , MW, 130°C             | <b>2a + 3a</b>              |

<sup>a</sup>The reaction were carried out with combinations of 0.1 eq base and 0.01 eq transition metal salt.

<sup>b</sup>The furocoumarin compound was found in the experiment following the route in this literature:

(1) G. Cheng, Y. Hu. *Chem. Commun.* **2007**, 31, 3285-3287

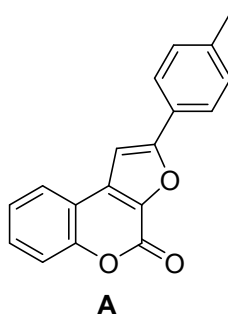

**Figure S1:** Structure of Furocoumarin A

## 2.NMR Spectra

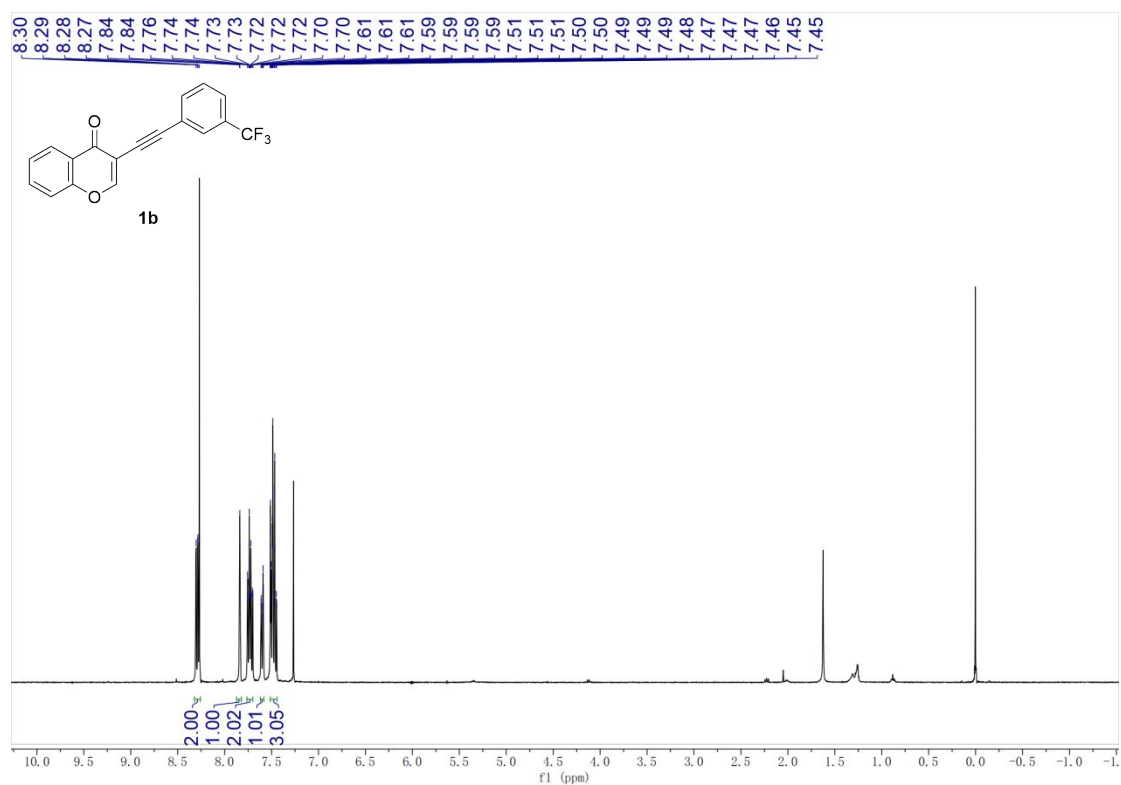

**Figure S2:** <sup>1</sup>H NMR Spectrum of Compound **1b**(400 MHz, CDCl<sub>3</sub>)

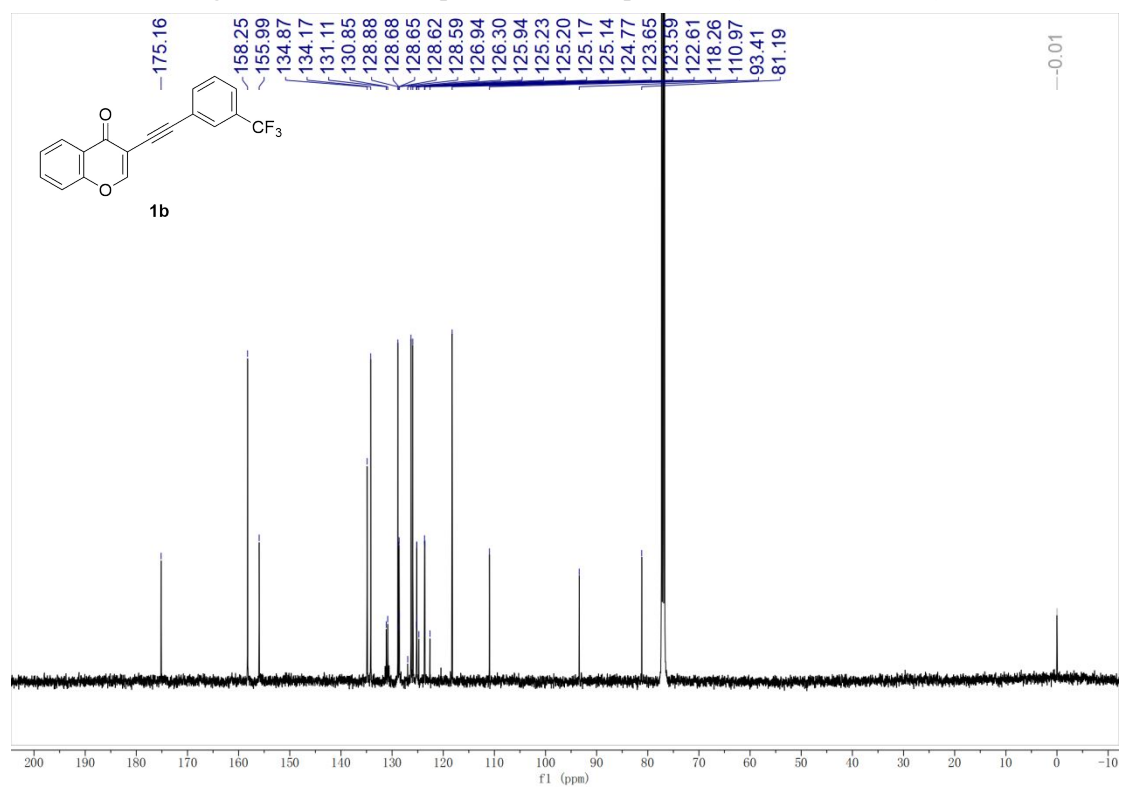

**Figure S3:** <sup>13</sup>C NMR Spectrum of Compound **1b**(125 MHz, CDCl<sub>3</sub>)

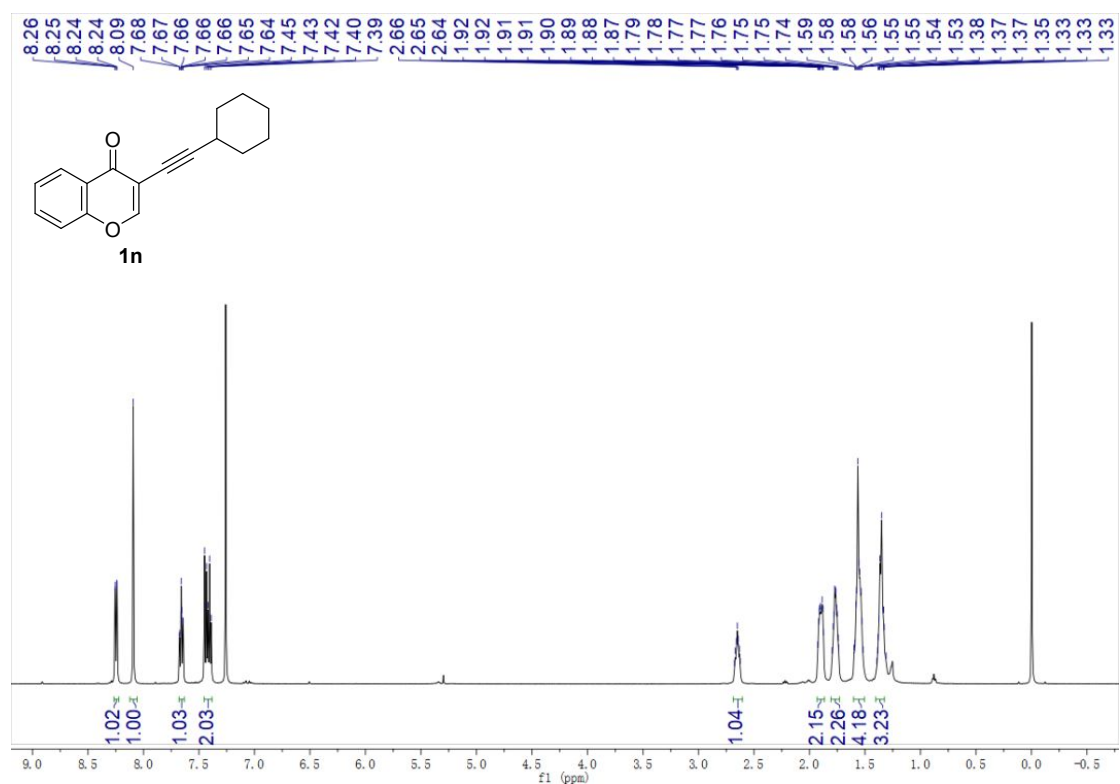

**Figure S4:** <sup>1</sup>H NMR Spectrum of Compound **1n**(500 MHz, CDCl<sub>3</sub>)

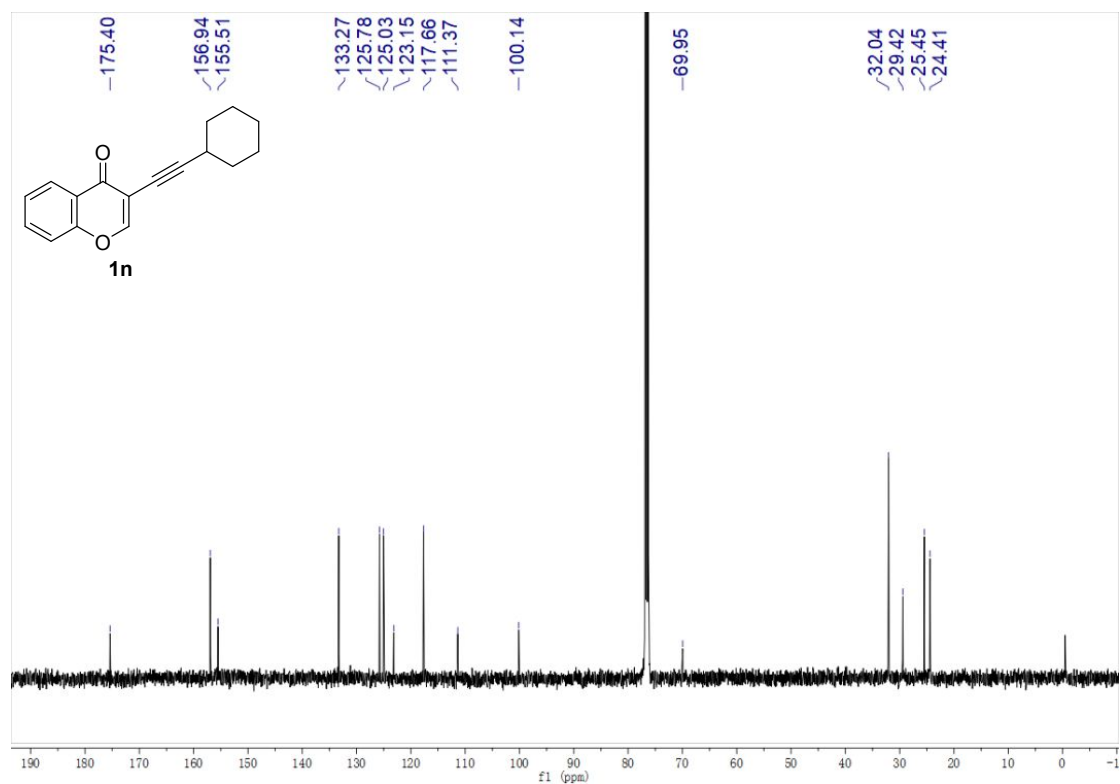

**Figure S5:** <sup>13</sup>C NMR Spectrum of Compound **1n**(125 MHz, CDCl<sub>3</sub>)

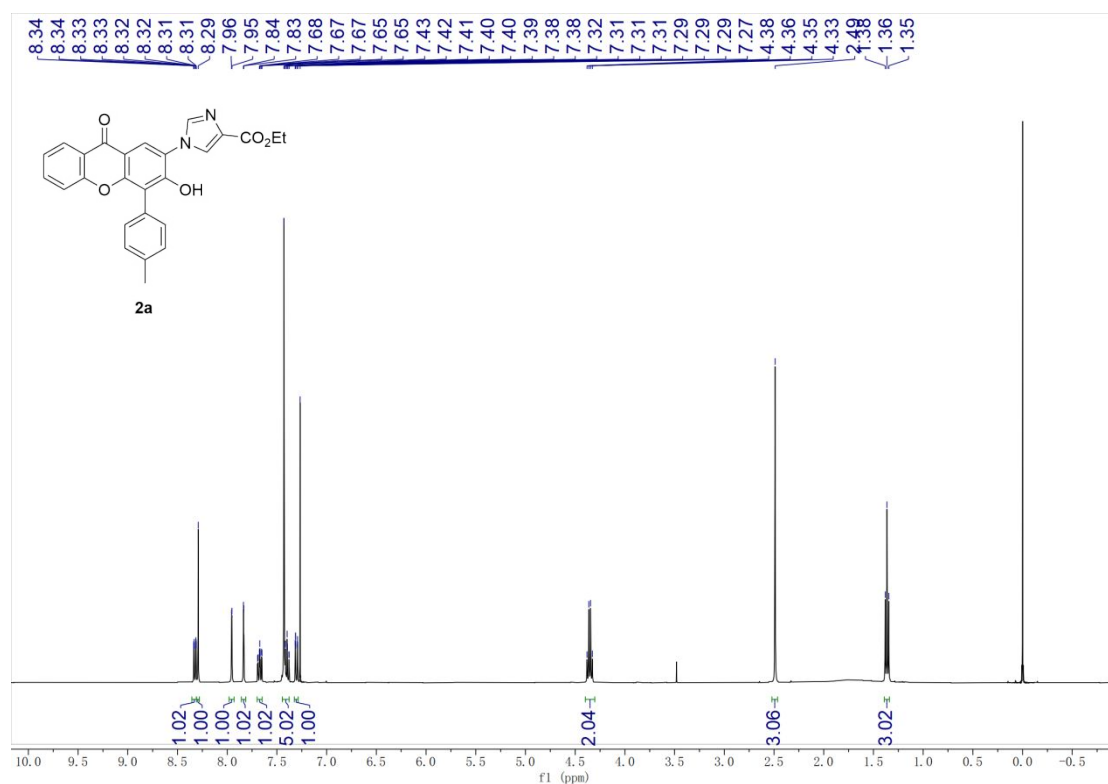

**Figure S6:** <sup>1</sup>H NMR Spectrum of Compound **2a**(400 MHz, CDCl<sub>3</sub>)

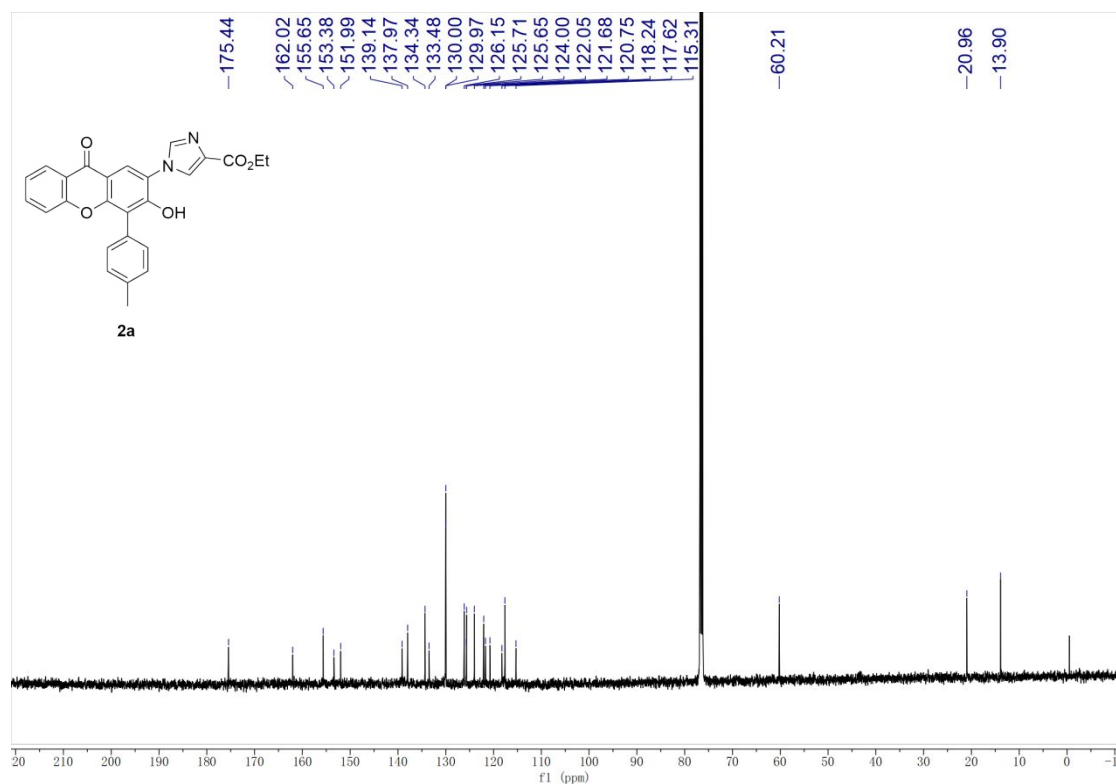

**Figure S7:** <sup>13</sup>C NMR Spectrum of Compound **2a**(125 MHz, CDCl<sub>3</sub>)

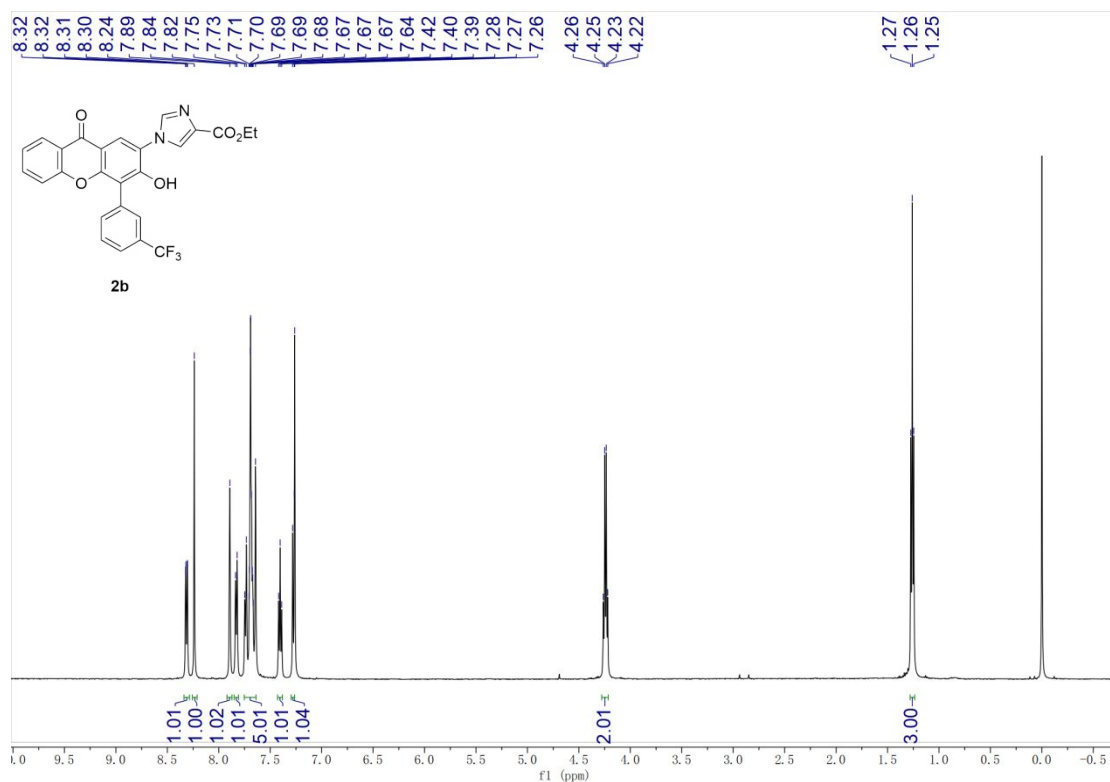

**Figure S8:** <sup>1</sup>H NMR Spectrum of Compound **2b**(500 MHz, CDCl<sub>3</sub>)

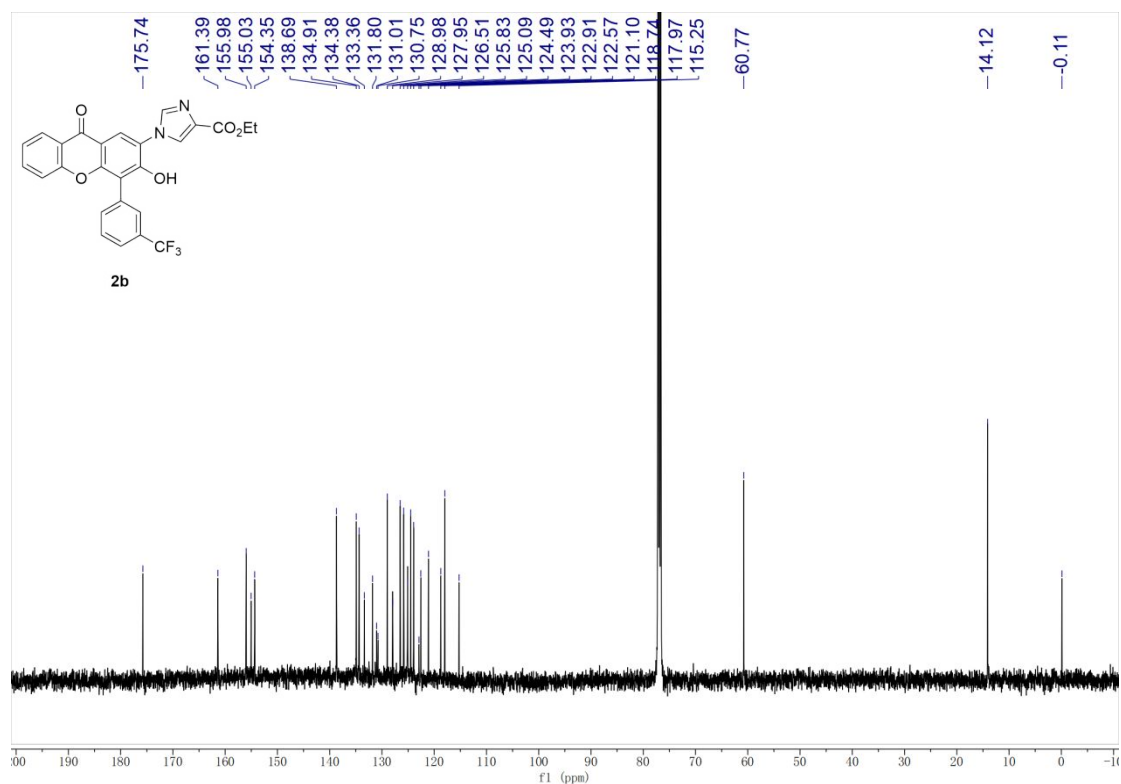

**Figure S9:** <sup>13</sup>C NMR Spectrum of Compound **2b**(125 MHz, CDCl<sub>3</sub>)

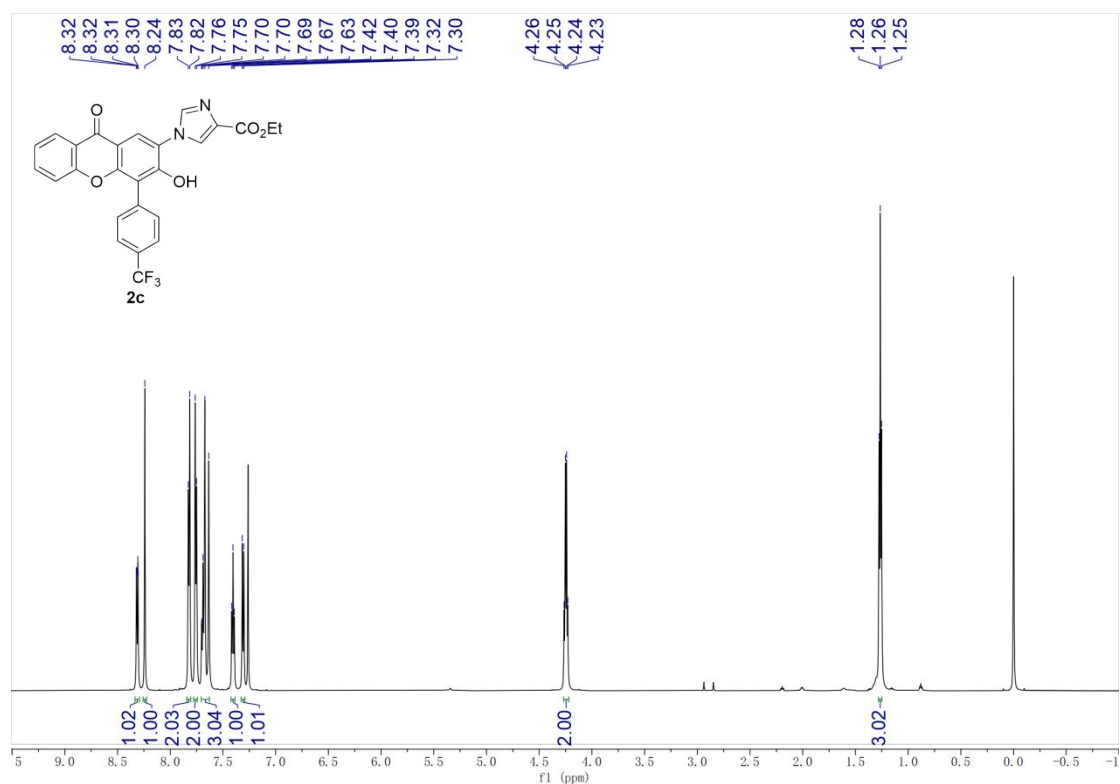

**Figure S10:** <sup>1</sup>H NMR Spectrum of Compound 2c(600 MHz, CDCl<sub>3</sub>)

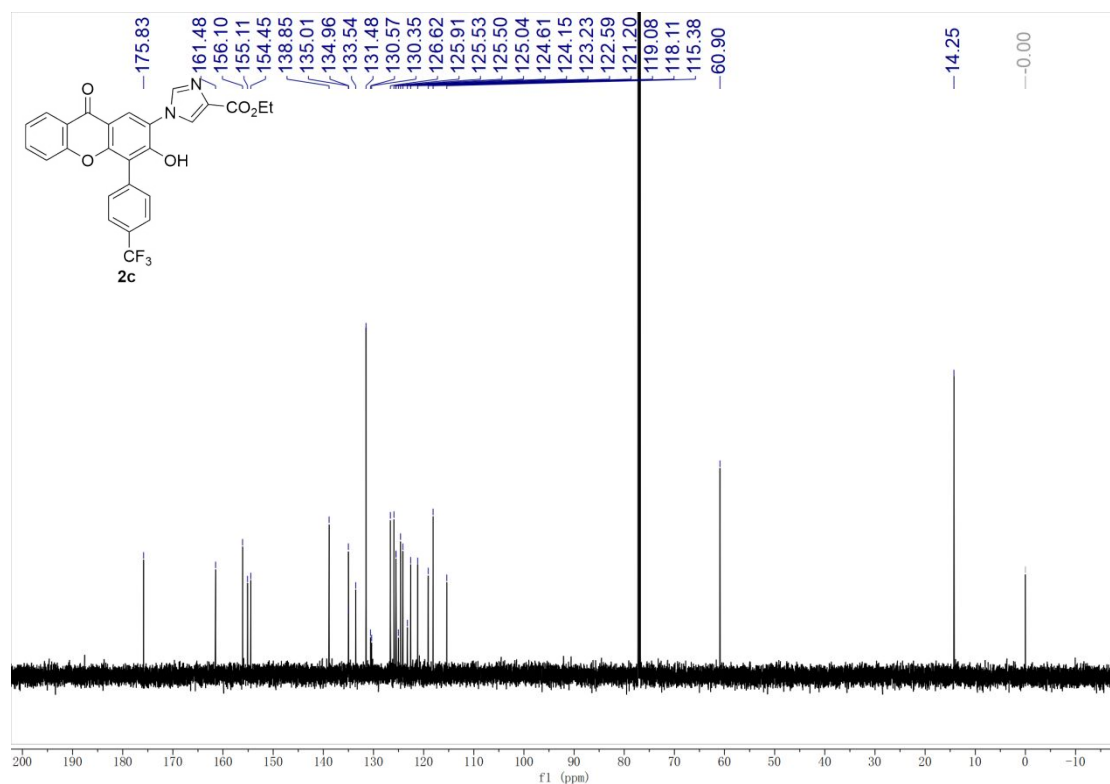

**Figure S11:** <sup>13</sup>C NMR Spectrum of Compound 2c(150 MHz, CDCl<sub>3</sub>)

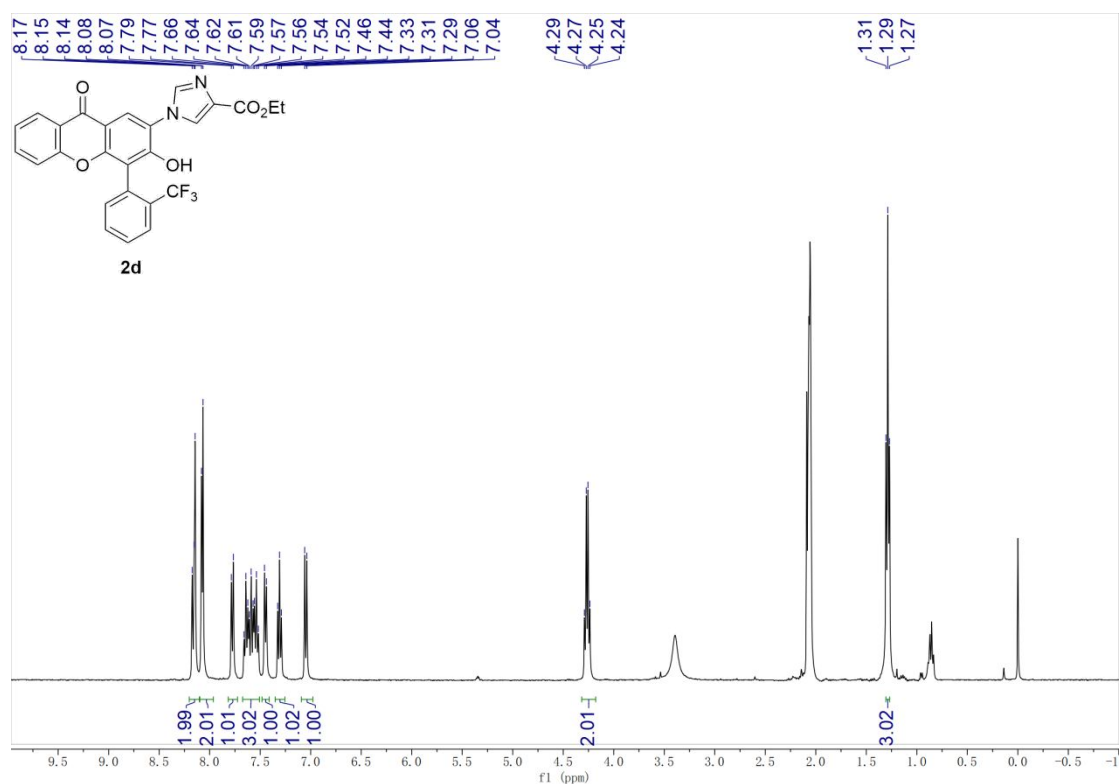

**Figure S12:** <sup>1</sup>H NMR Spectrum of Compound **2d**(400 MHz, Acetone-*d*<sub>6</sub>)

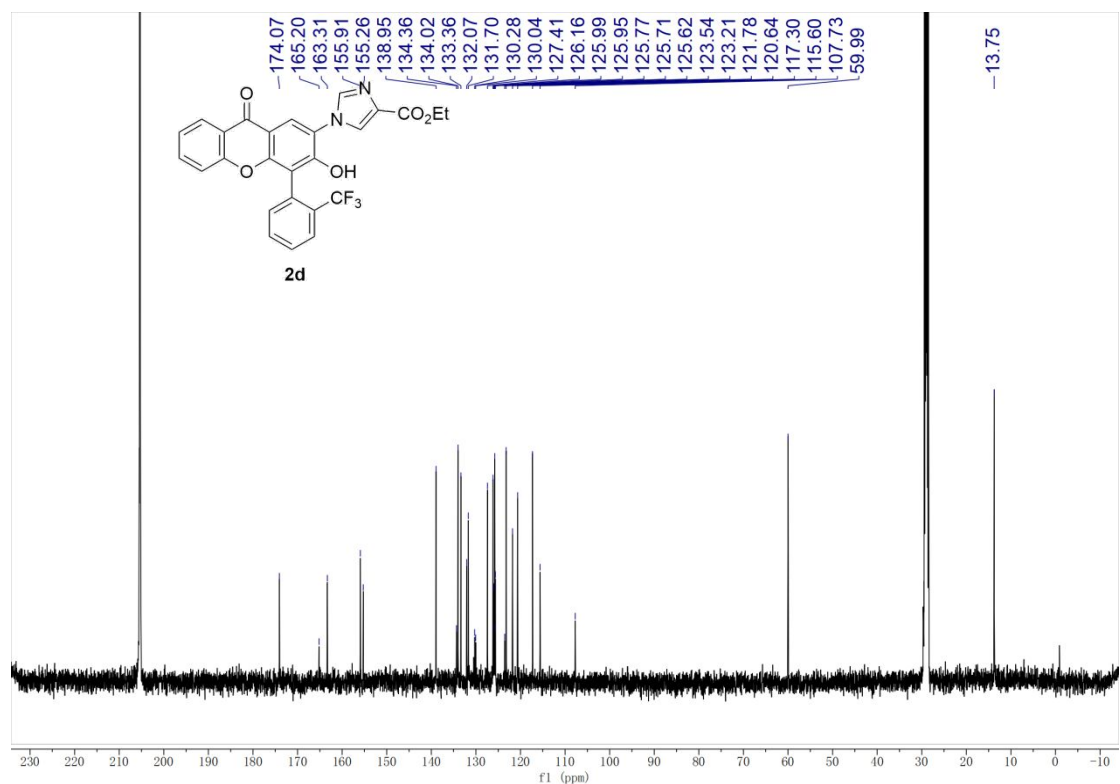

**Figure S13:** <sup>13</sup>C NMR Spectrum of Compound **2d**(125 MHz, Acetone-*d*<sub>6</sub>)



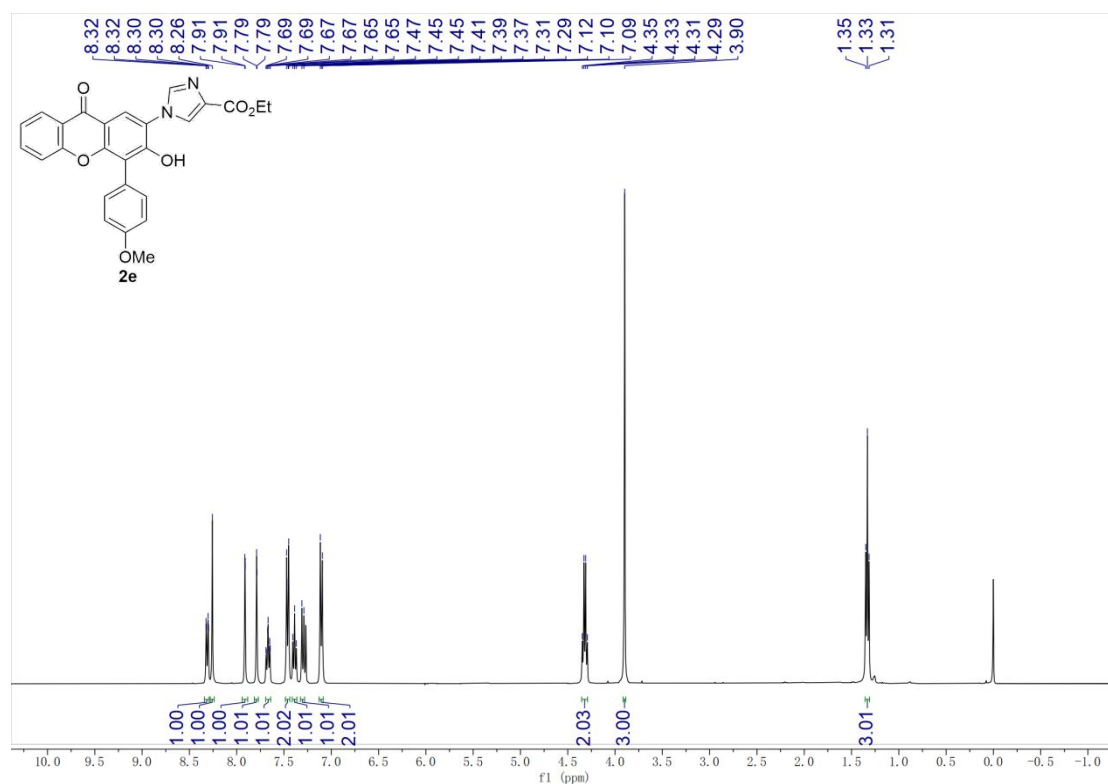

**Figure S14:** <sup>1</sup>H NMR Spectrum of Compound **2e**(400 MHz, CDCl<sub>3</sub>)

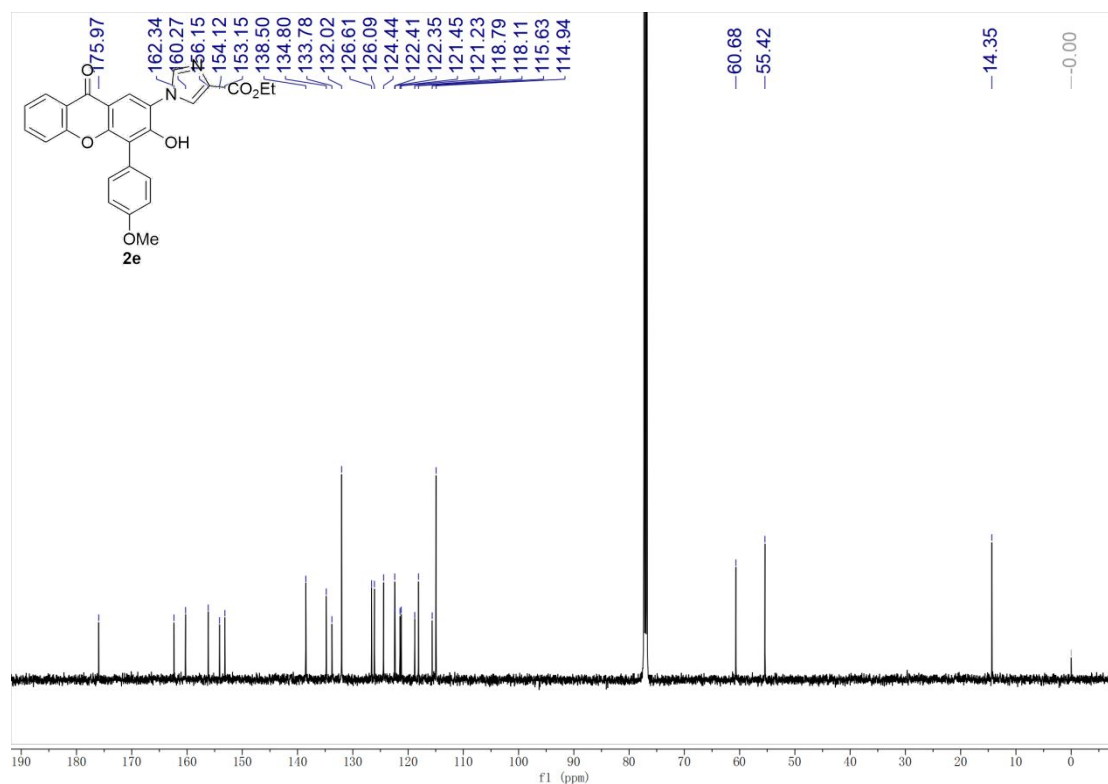

**Figure S15:** <sup>13</sup>C NMR Spectrum of Compound **2e**(125 MHz, CDCl<sub>3</sub>)

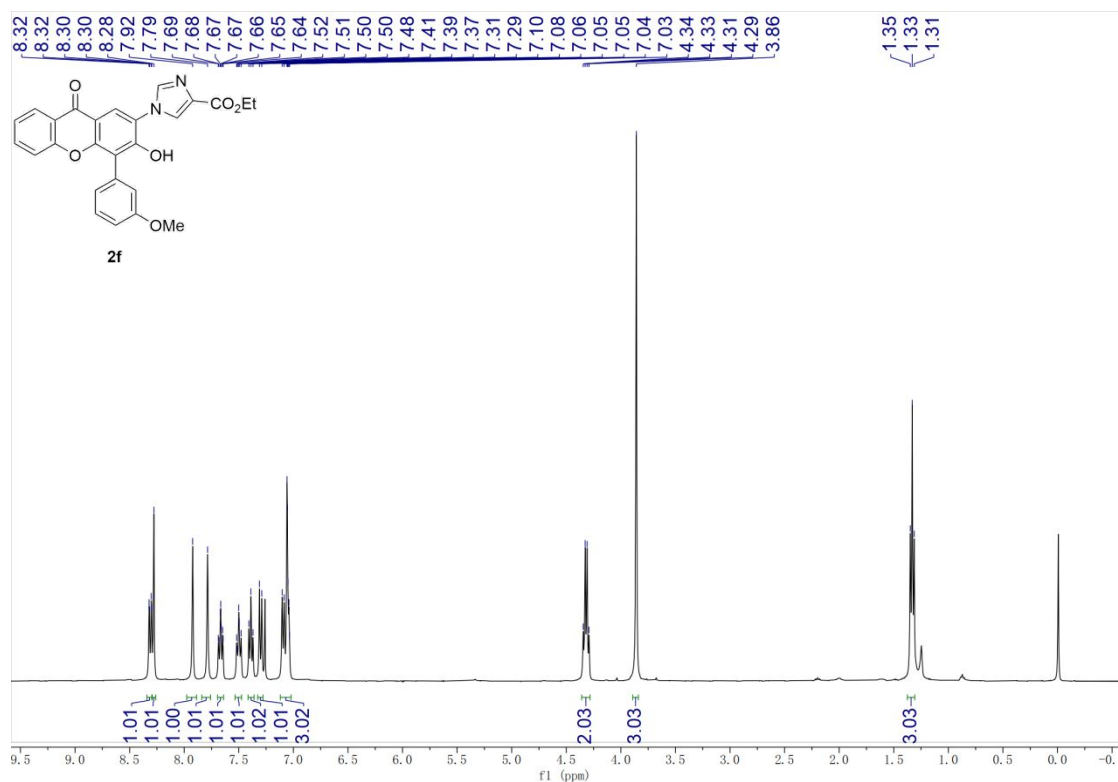

**Figure S16:** <sup>1</sup>H NMR Spectrum of Compound **2f**(400 MHz, CDCl<sub>3</sub>)

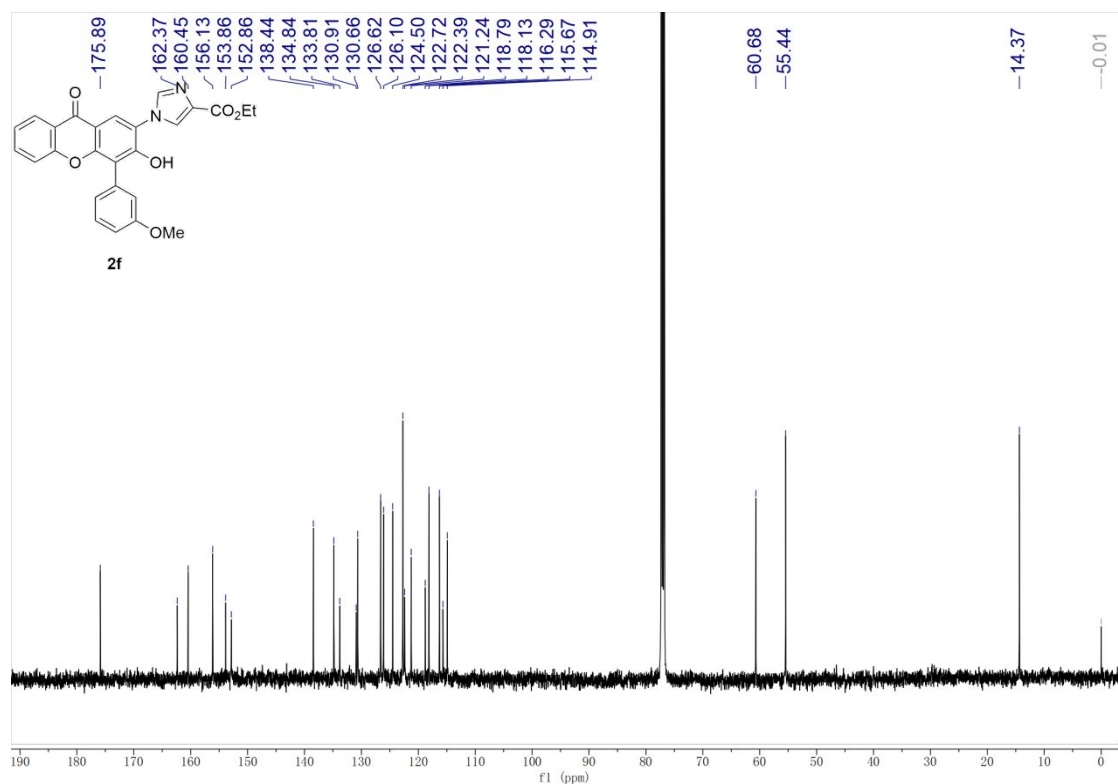

**Figure S17:** <sup>13</sup>C NMR Spectrum of Compound **2f**(125 MHz, CDCl<sub>3</sub>)

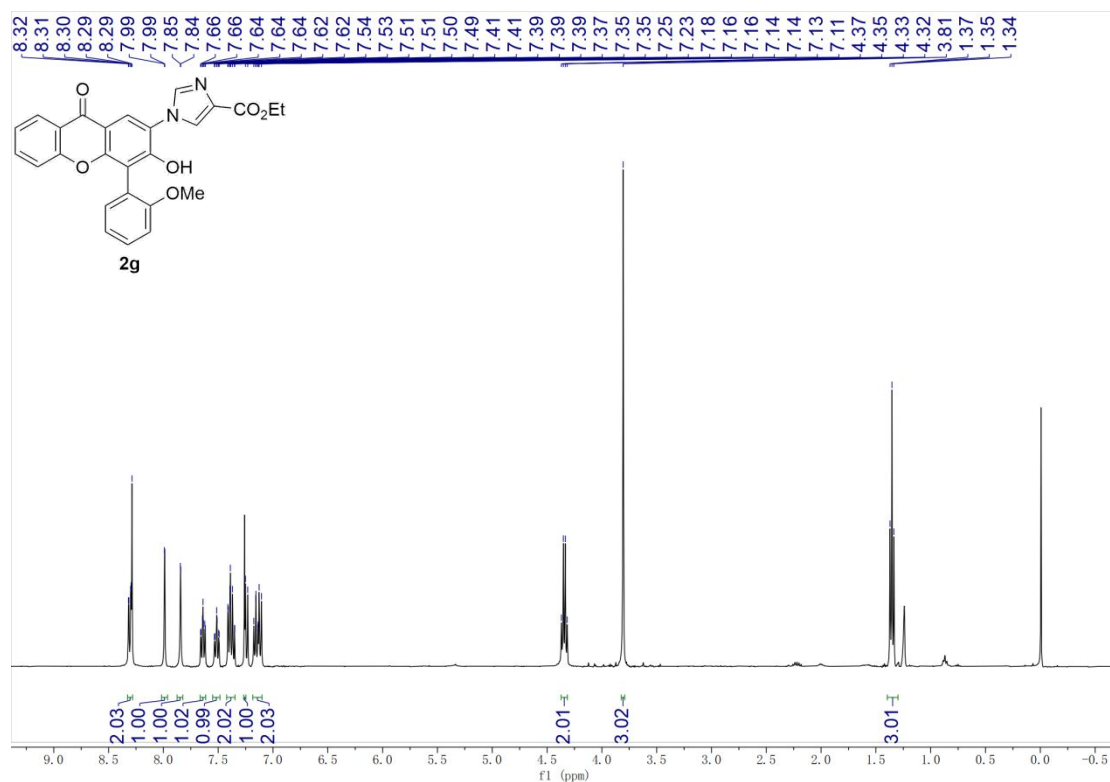

**Figure S18:** <sup>1</sup>H NMR Spectrum of Compound **2g**(400 MHz, CDCl<sub>3</sub>)

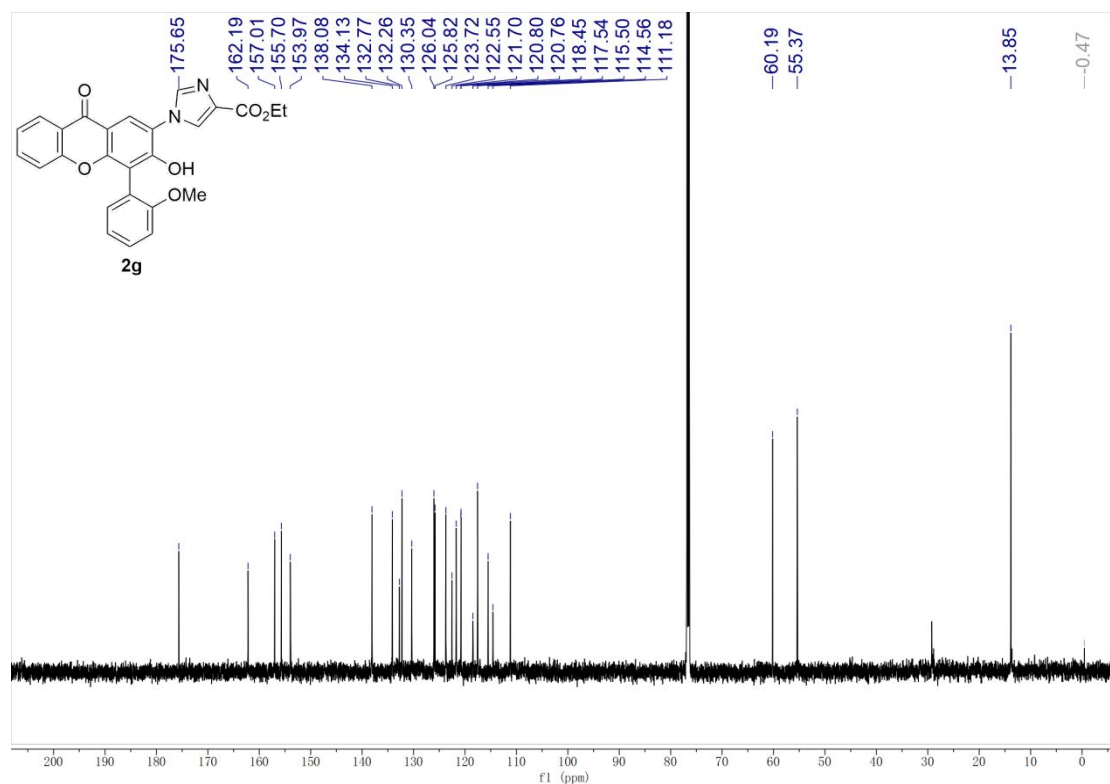

**Figure S19:** <sup>13</sup>C NMR Spectrum of Compound **2g**(150 MHz, CDCl<sub>3</sub>)

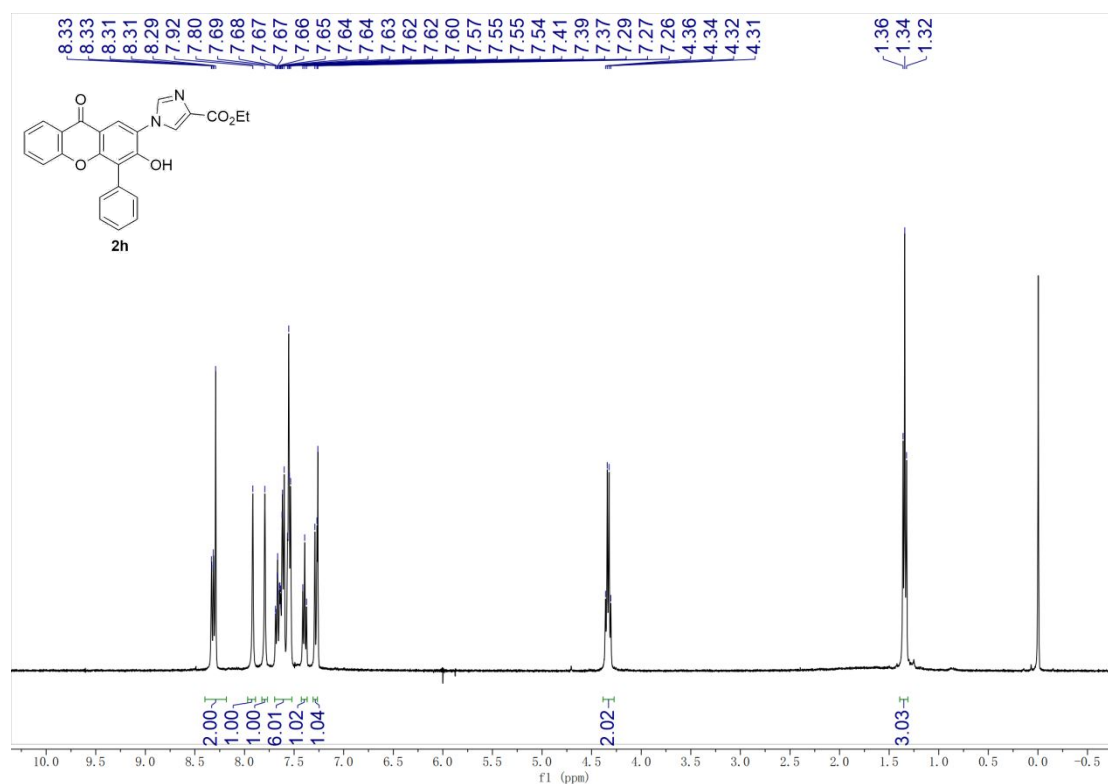

**Figure S20:** <sup>1</sup>H NMR Spectrum of Compound **2h**(400 MHz, CDCl<sub>3</sub>)

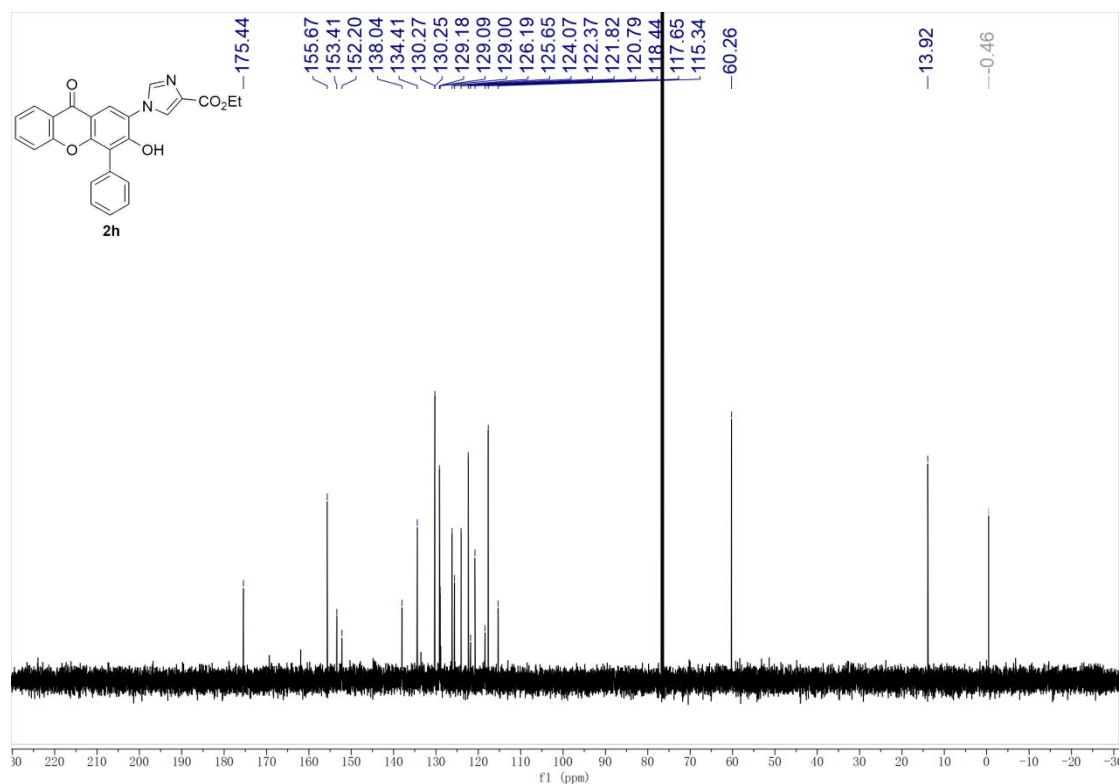

**Figure S21:** <sup>13</sup>C NMR Spectrum of Compound **2h**(125 MHz, CDCl<sub>3</sub>)

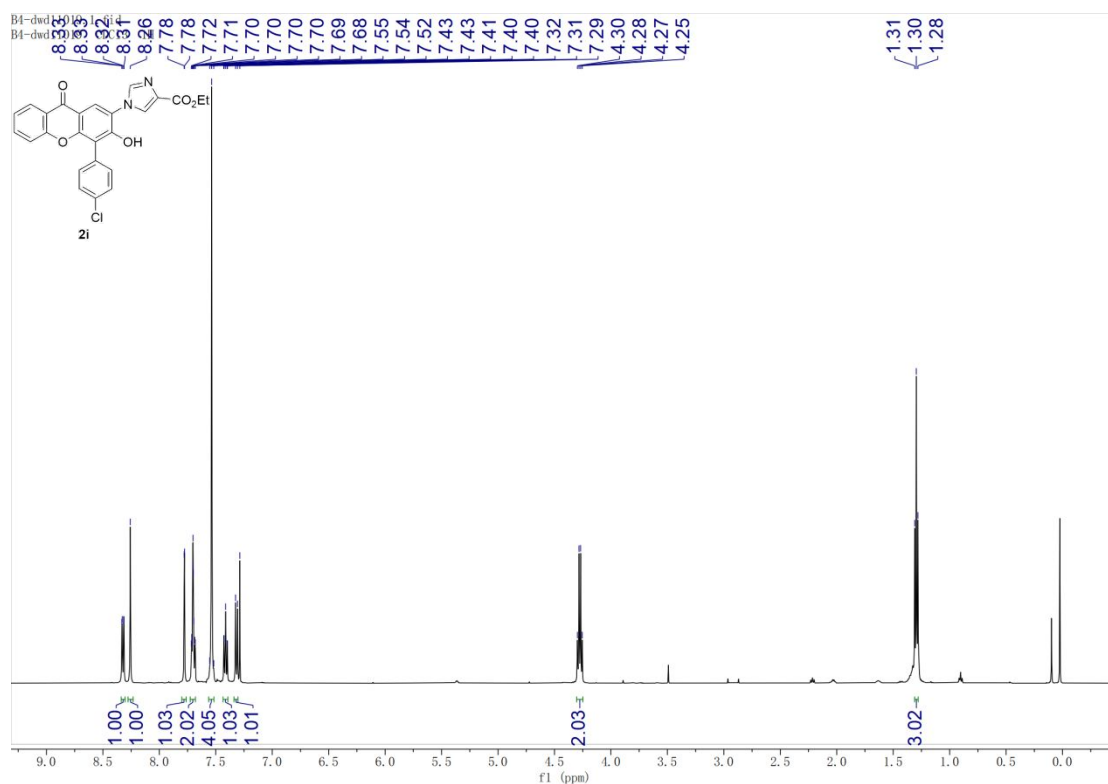

**Figure S22:** <sup>1</sup>H NMR Spectrum of Compound **2i**(500 MHz, CDCl<sub>3</sub>)

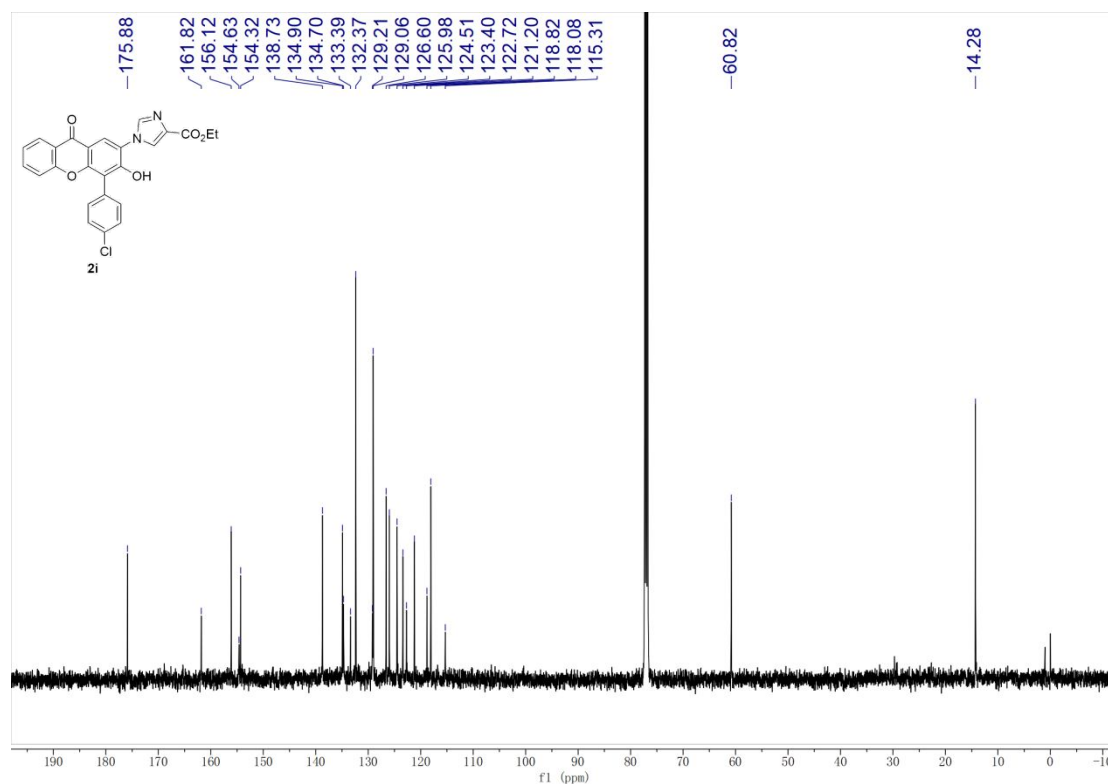

**Figure S23:** <sup>13</sup>C NMR Spectrum of Compound **2i**(125 MHz, CDCl<sub>3</sub>)

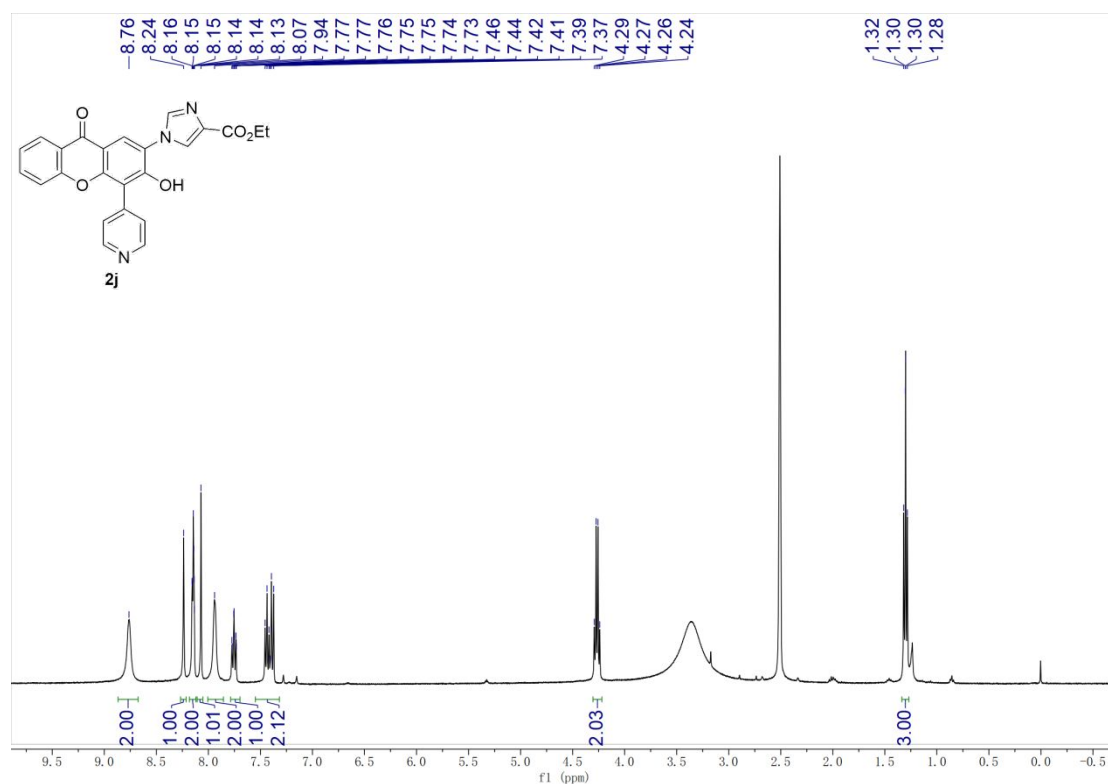

**Figure S24:** <sup>1</sup>H NMR Spectrum of Compound **2j**(400 MHz, DMSO-*d*<sub>6</sub>)

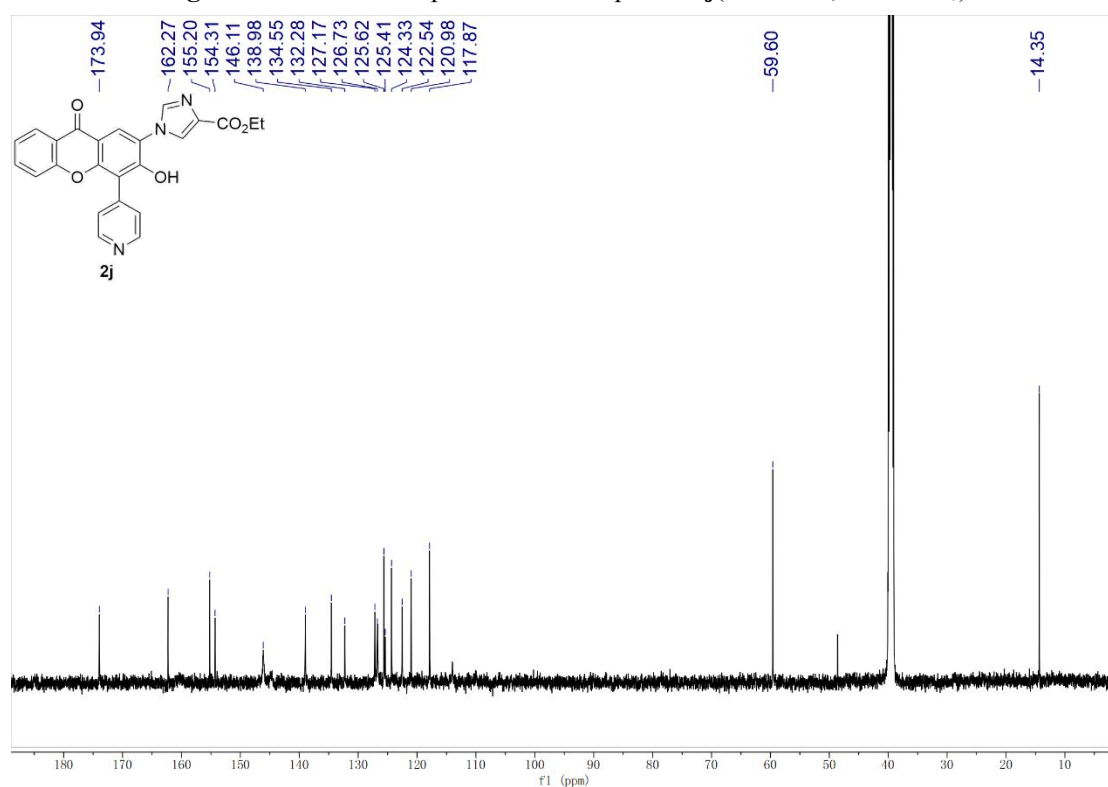

**Figure S25:** <sup>13</sup>C NMR Spectrum of Compound **2j**(150 MHz, 1:20 v/v CD<sub>3</sub>OD in DMSO-*d*<sub>6</sub>)

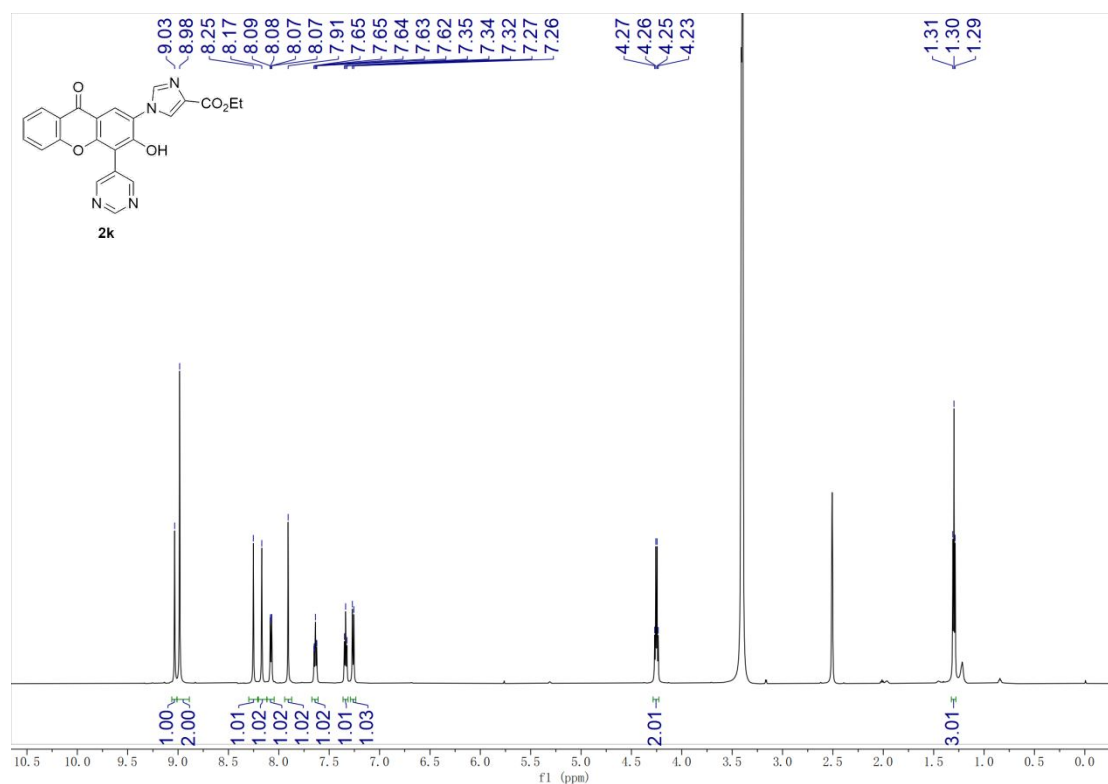

**Figure S26:** <sup>1</sup>H NMR Spectrum of Compound **2k**(600 MHz, DMSO-*d*<sub>6</sub>)

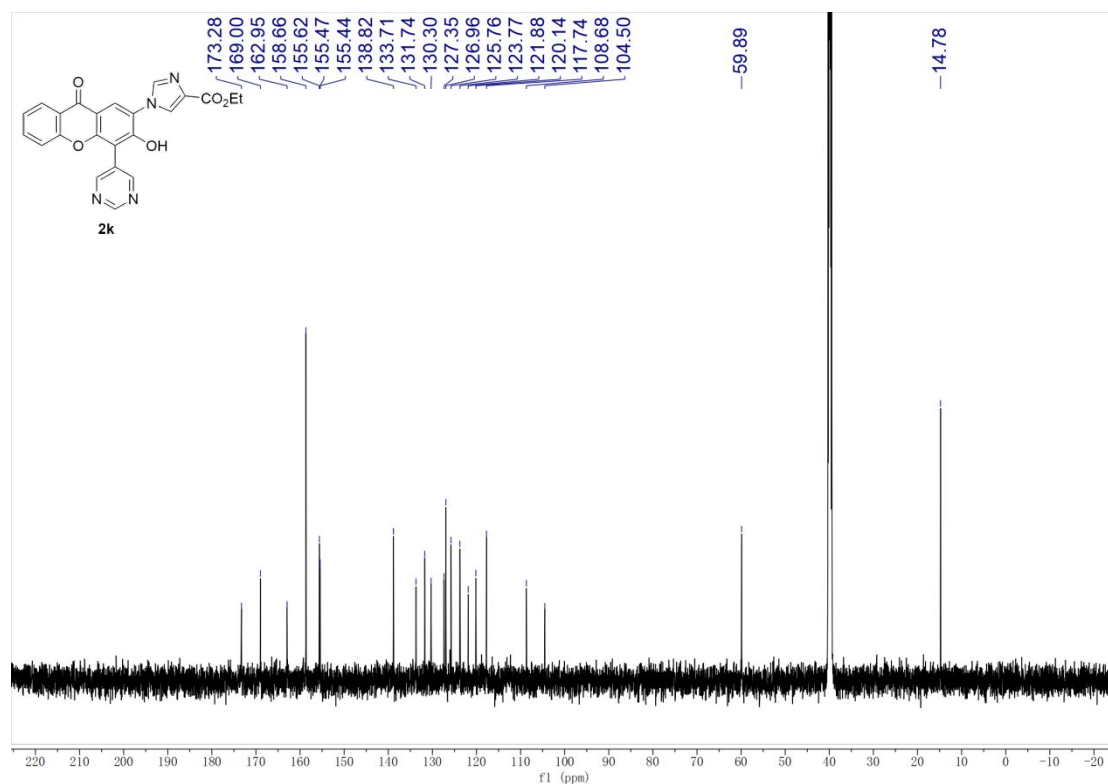

**Figure S27:** <sup>13</sup>C NMR Spectrum of Compound **2k**(150 MHz, DMSO-*d*<sub>6</sub>)

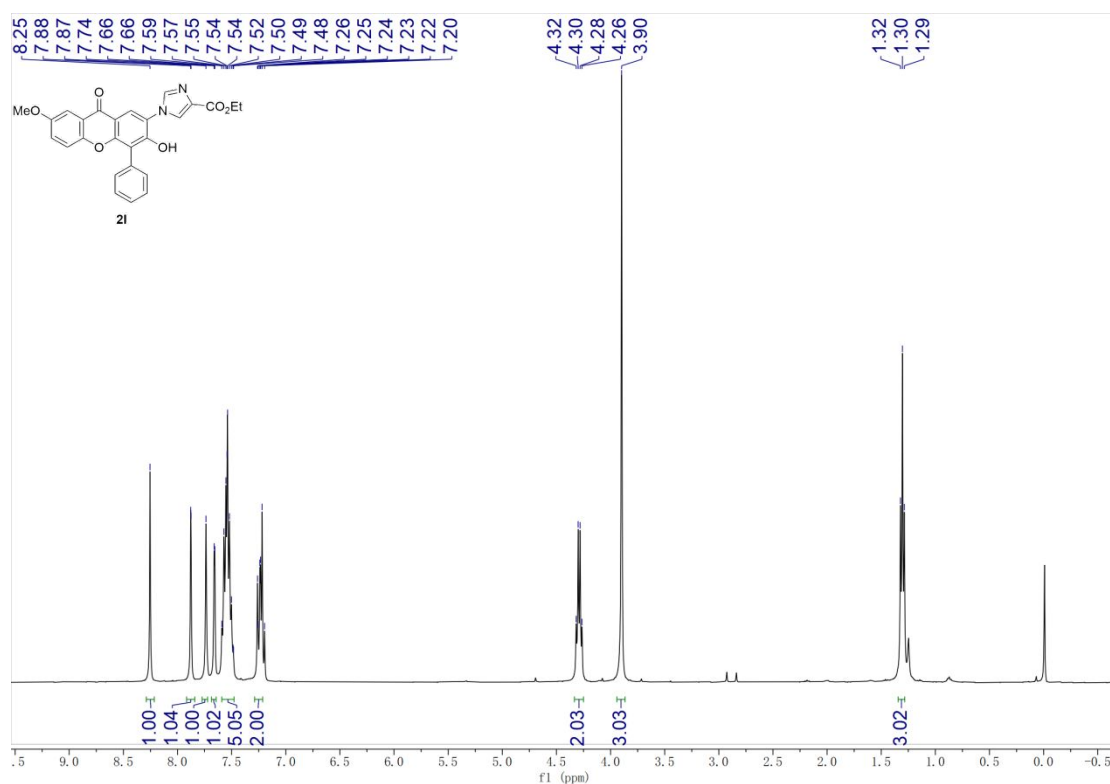

**Figure S28:** <sup>1</sup>H NMR Spectrum of Compound **2I**(400 MHz, CDCl<sub>3</sub>)

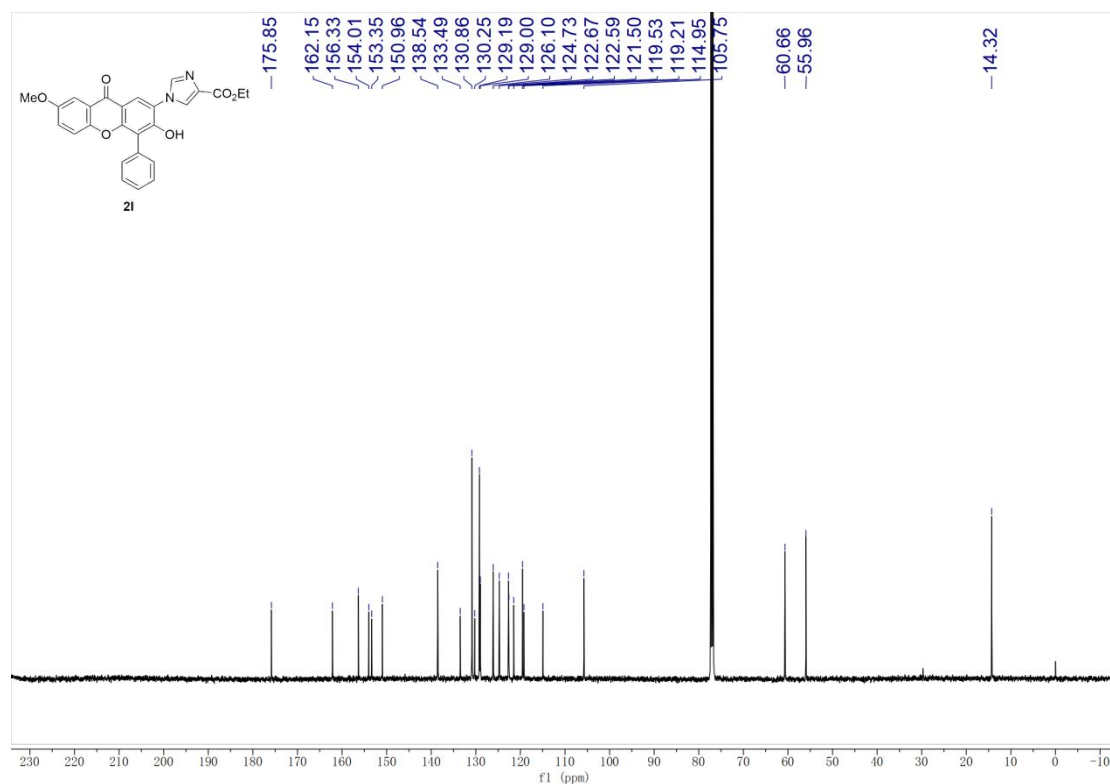

**Figure S29:** <sup>13</sup>C NMR Spectrum of Compound **2I**(125 MHz, CDCl<sub>3</sub>)



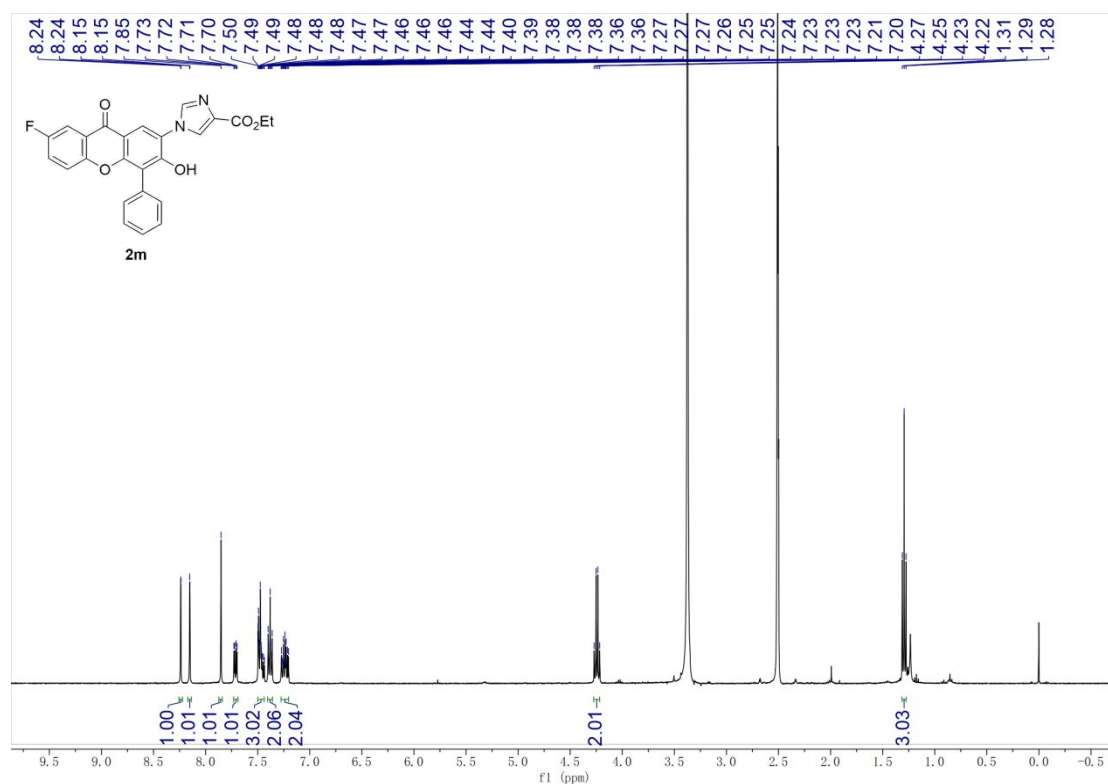

**Figure S30:** <sup>1</sup>H NMR Spectrum of Compound **2m**(400 MHz, DMSO-*d*<sub>6</sub>)

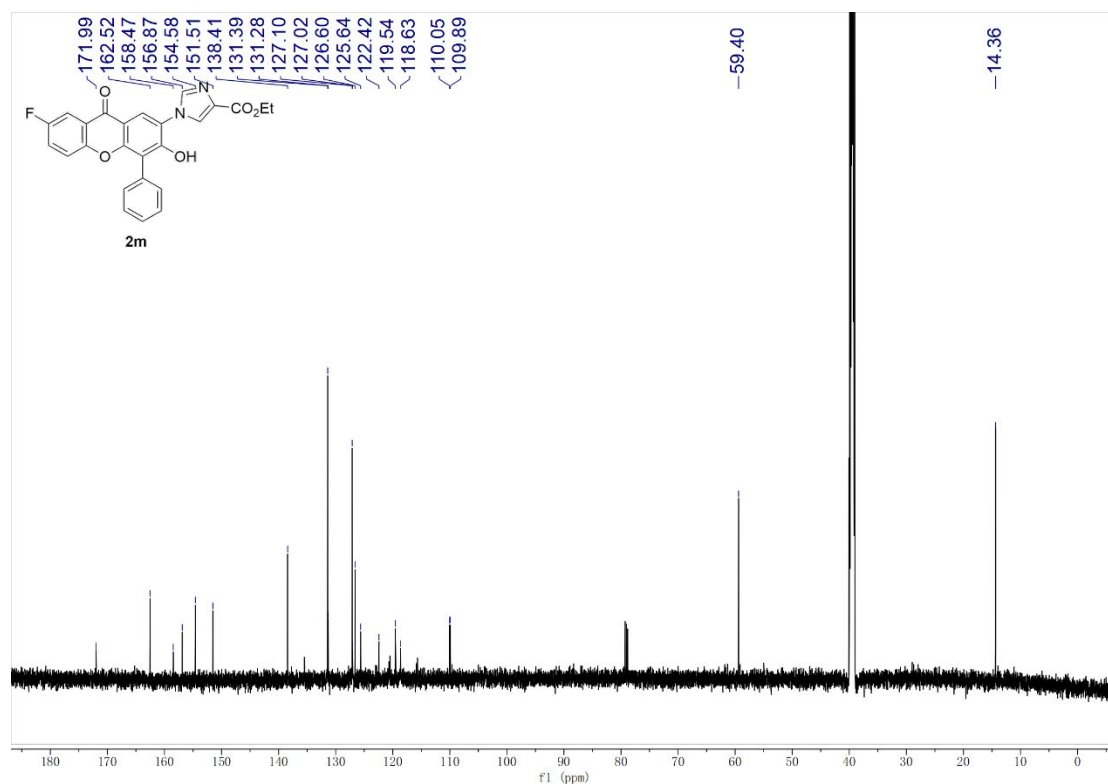

**Figure S31:** <sup>13</sup>C NMR Spectrum of Compound **2m**(150 MHz, DMSO-*d*<sub>6</sub>)

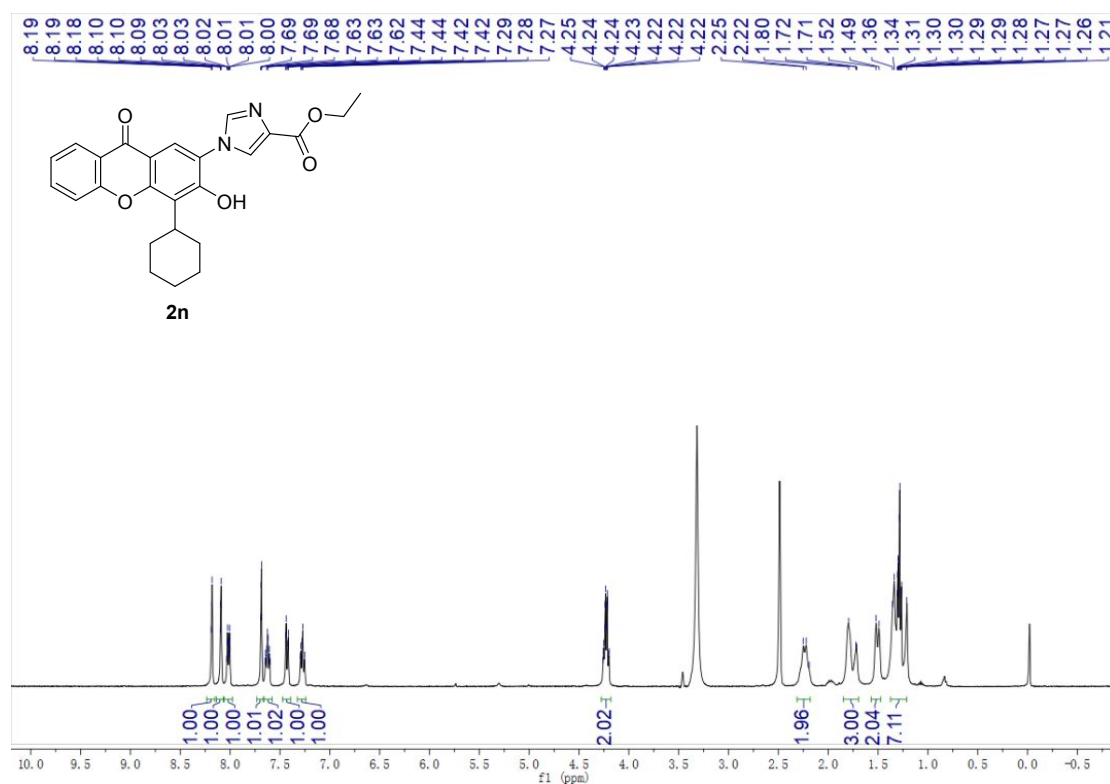

**Figure S32:** <sup>1</sup>H NMR Spectrum of Compound **2n**(400 MHz, DMSO-*d*<sub>6</sub>)

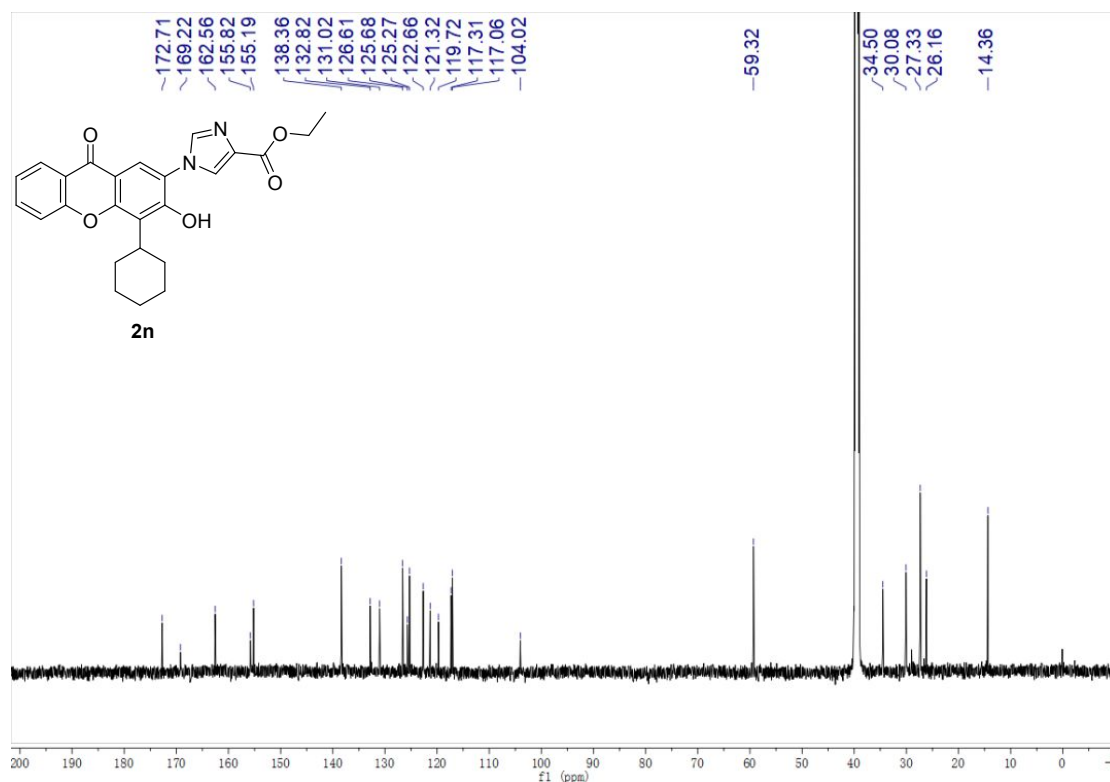

**Figure S33:** <sup>13</sup>C NMR Spectrum of Compound **2n**(150 MHz, DMSO-*d*<sub>6</sub>)

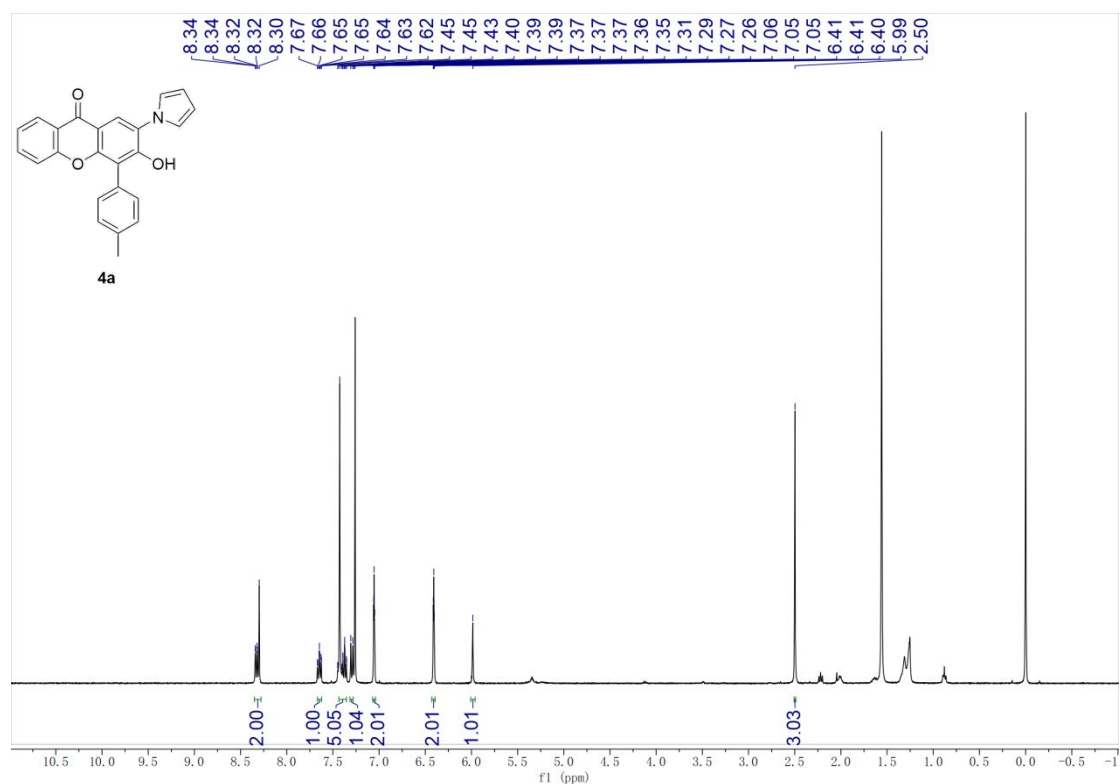

**Figure S34:**  $^1\text{H}$  NMR Spectrum of Compound **4a**(500 MHz,  $\text{CDCl}_3$ )

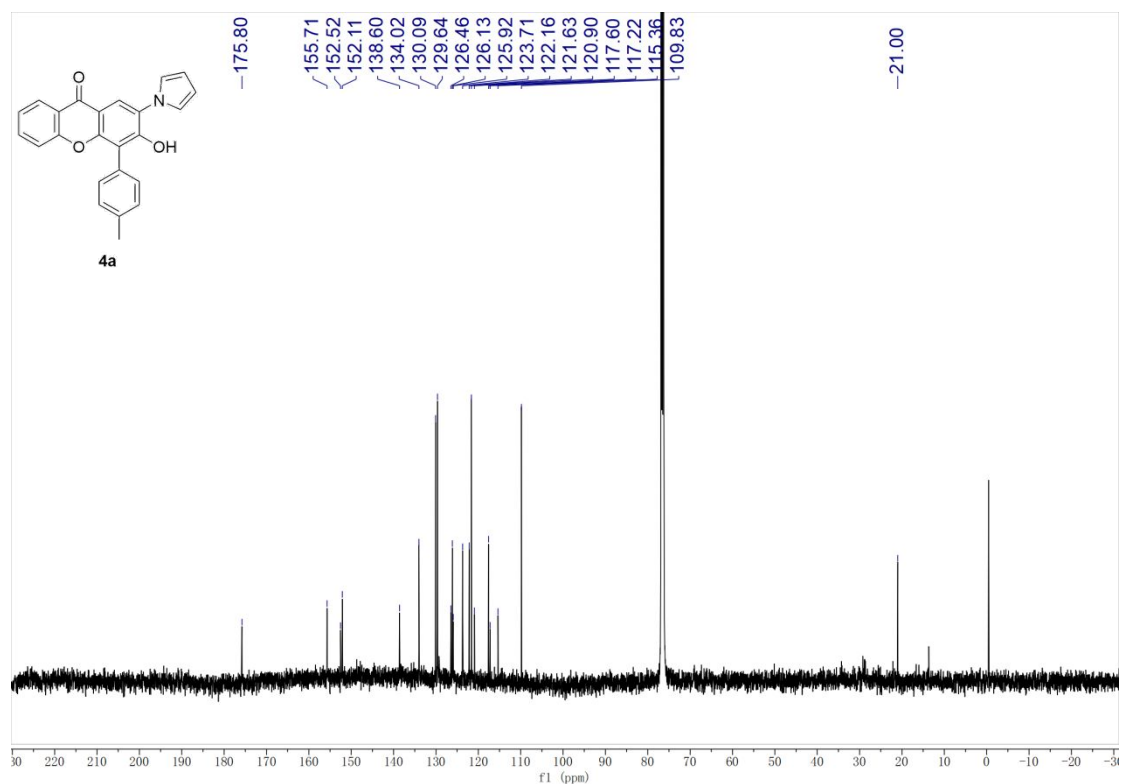

**Figure S35:**  $^{13}\text{C}$  NMR Spectrum of Compound **4a**(125 MHz,  $\text{CDCl}_3$ )

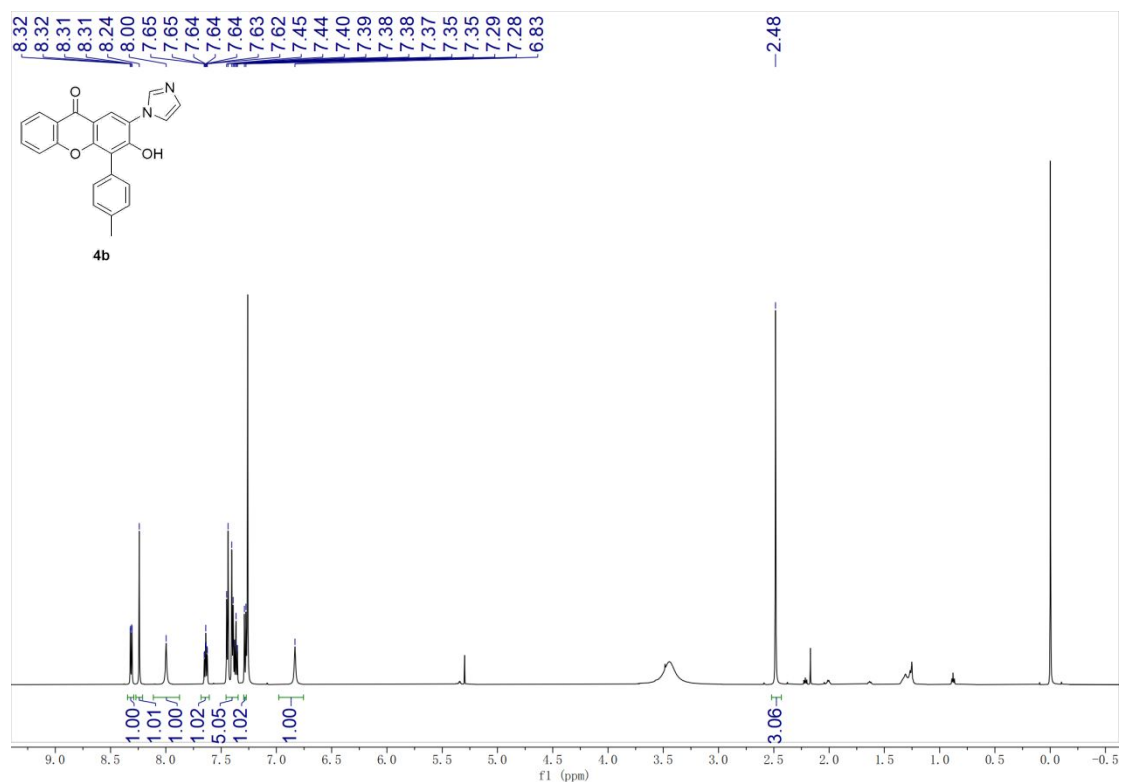

**Figure S36:** <sup>1</sup>H NMR Spectrum of Compound **4b**(600 MHz, CDCl<sub>3</sub>)

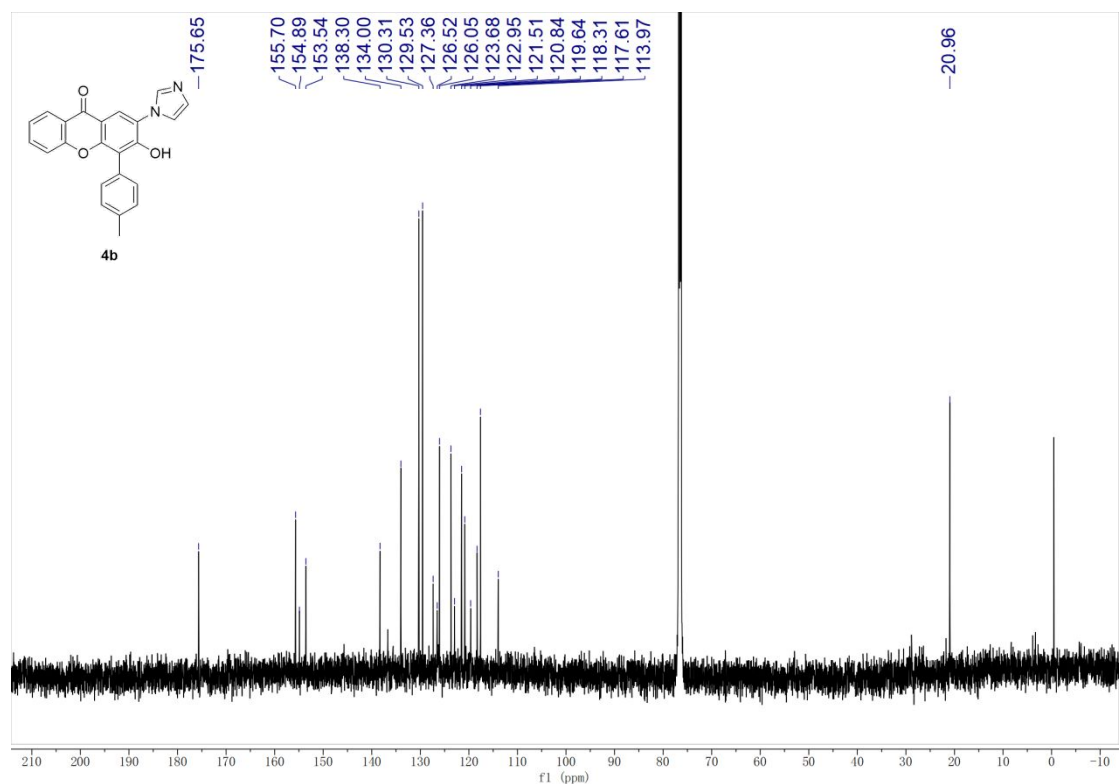

**Figure S37:** <sup>13</sup>C NMR Spectrum of Compound **4b**(150 MHz, CDCl<sub>3</sub>)

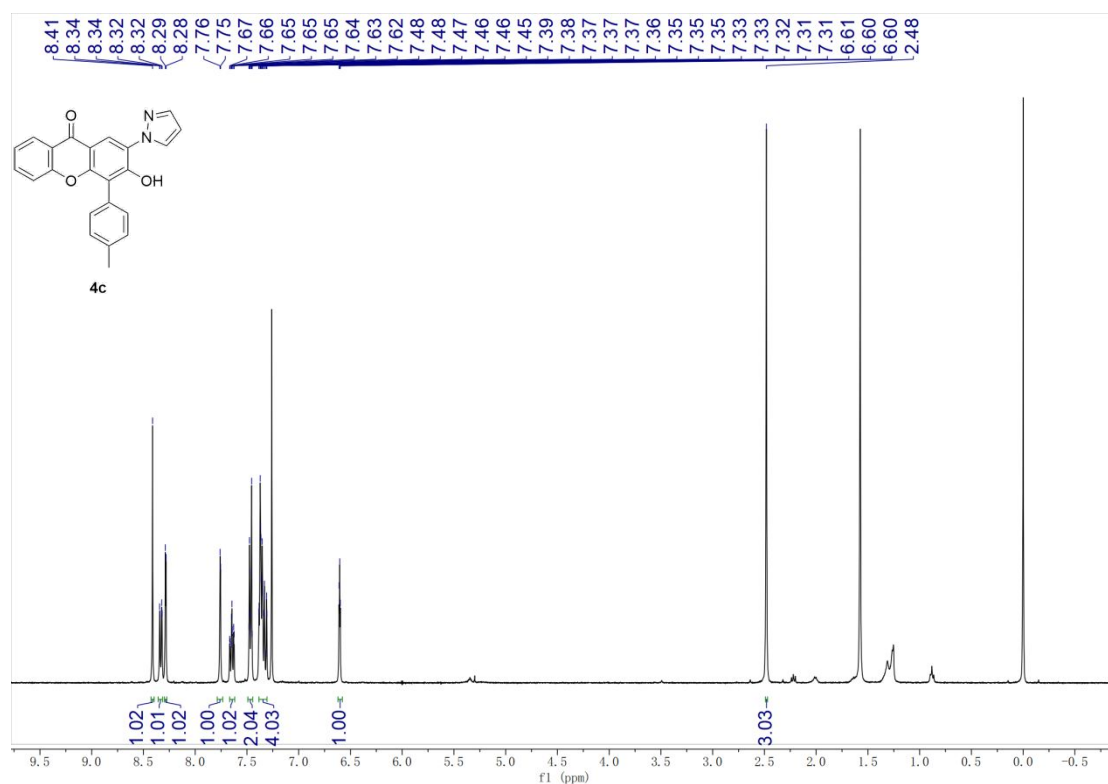

**Figure S38:** <sup>1</sup>H NMR Spectrum of Compound **4c**(400 MHz, CDCl<sub>3</sub>)

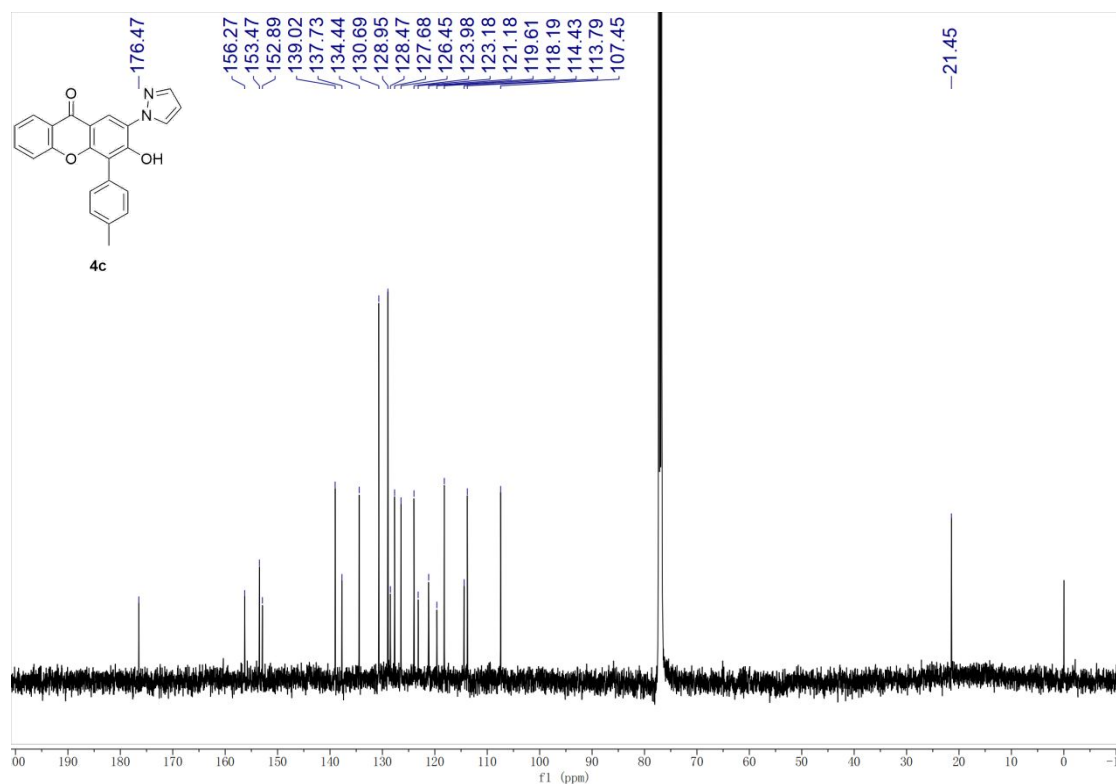

**Figure S39:** <sup>13</sup>C NMR Spectrum of Compound **4c**(125 MHz, CDCl<sub>3</sub>)

### 3. X-ray Crystallography data of compound **2i**

Compound **2i** was recrystallized in mixed solvent of hexane and dichloromethane.

CCDC 1987456 (**2i**) contains the supplementary crystallographic data for this paper. These data can be obtained free of charge from The Cambridge Crystallographic Data Centre via [www.ccdc.cam.ac.uk/data\\_request/cif](http://www.ccdc.cam.ac.uk/data_request/cif)

**Table S2** Crystal refinement data of compound **2i**

|                                             |                                                                 |
|---------------------------------------------|-----------------------------------------------------------------|
| Empirical formula                           | C <sub>28</sub> H <sub>24</sub> ClN <sub>2</sub> O <sub>5</sub> |
| Formula weight                              | 503.94                                                          |
| Temperature/K                               | 110.0                                                           |
| Crystal system                              | tetragonal                                                      |
| Space group                                 | P4/n                                                            |
| a/Å                                         | 26.429(2)                                                       |
| b/Å                                         | 26.429(2)                                                       |
| c/Å                                         | 7.8670(7)                                                       |
| $\alpha$ /°                                 | 90                                                              |
| $\beta$ /°                                  | 90                                                              |
| $\gamma$ /°                                 | 90                                                              |
| Volume/Å <sup>3</sup>                       | 5495.1(11)                                                      |
| Z                                           | 8                                                               |
| $\rho_{\text{calc}}$ /cm <sup>3</sup>       | 1.218                                                           |
| $\mu$ /mm <sup>-1</sup>                     | 0.177                                                           |
| F(000)                                      | 2104.0                                                          |
| Crystal size/mm <sup>3</sup>                | 0.12 × 0.08 × 0.05                                              |
| Radiation                                   | MoK $\alpha$ ( $\lambda$ = 0.71073)                             |
| 2 $\theta$ range for data collection/°      | 4.36 to 50.018                                                  |
| Index ranges                                | -31 ≤ h ≤ 31, -28 ≤ k ≤ 27, -9 ≤ l ≤ 8                          |
| Reflections collected                       | 18173                                                           |
| Independent reflections                     | 4844 [R <sub>int</sub> = 0.1201, R <sub>sigma</sub> = 0.1197]   |
| Data/restraints/parameters                  | 4844/0/328                                                      |
| Goodness-of-fit on F <sup>2</sup>           | 1.048                                                           |
| Final R indexes [I ≥ 2 $\sigma$ (I)]        | R <sub>1</sub> = 0.0746, wR <sub>2</sub> = 0.1877               |
| Final R indexes [all data]                  | R <sub>1</sub> = 0.1561, wR <sub>2</sub> = 0.2393               |
| Largest diff. peak/hole / e Å <sup>-3</sup> | 0.57/-0.41                                                      |
